# Supplementary material
Source: PubMed Central journal article supplement (PMC2726931)

Supporting Information  
For

**Is Donor-Acceptor Hydrogen Bonding Necessary for 4,6-*O*-Benzylidene-directed  $\beta$ -Mannopsylation?  
Stereoselective Synthesis of  $\beta$ -C-Mannopyranosides and  $\alpha$ -C-Glucopyranosides**

**David Crich\* and Indrajeet Sharma**

*Department of Chemistry, Wayne State University, 5101 Cass Avenue, Detroit, MI 48202, and Department of Chemistry, University of Illinois at Chicago, 845 West Taylor Street, Chicago, IL 60607*

**Table of Contents**

| <b>Compound</b>                                                                                                                                | <b>Expt</b> | <b>Spectra</b> |
|------------------------------------------------------------------------------------------------------------------------------------------------|-------------|----------------|
| <b>2,3-Di-<i>O</i>-benzyl-4,6-<i>O</i>-benzylidene-1-deoxy-1-allyl-<math>\alpha</math>-D-mannopyranose (7<math>\alpha</math>)</b>              | S-2,<br>S-3 | S-9,<br>S-10   |
| <b>2,3-Di-<i>O</i>-benzyl-4,6-<i>O</i>-benzylidene-1-deoxy-1-allyl-<math>\beta</math>-D-mannopyranose (7<math>\beta</math>)</b>                | S-3         | S-11,<br>S-12  |
| <b>2,3-Di-<i>O</i>-benzyl-4,6-<i>O</i>-benzylidene-1-deoxy-(3,3-dimethyl-2-oxobutyl)-<math>\beta</math>-D-mannopyranose (8a)</b>               | S-3,<br>S-4 | S-13,<br>S-14  |
| <b>(3,3-dimethyl-2buten-2-yl) 2,3-Di-<i>O</i>-benzyl-4,6-<i>O</i>-benzylidene-<math>\alpha</math>-D-mannopyranoside (8b)</b>                   | S-4         | S-15,<br>S-16  |
| <b>2,3-Di-<i>O</i>-benzyl-4,6-<i>O</i>-benzylidene-1-deoxy-1-(2-oxo-2-phenylethyl)-<math>\beta</math>-D-mannopyranose (9)</b>                  | S-4         | S-17,<br>S-18  |
| <b>(2,3-Di-<i>O</i>-benzyl-4,6-<i>O</i>-benzylidene)-1R-1-(2-oxo-cyclohexyl)-1-deoxy-<math>\beta</math>-D-mannopyranose (10a)</b>              | S-5         | S-19,<br>S-20  |
| <b>Assignment of Configuration in 10a &amp; 10b</b>                                                                                            | S-5,<br>S-6 |                |
| <b>(2,3-Di-<i>O</i>-benzyl-4,6-<i>O</i>-benzylidene-<math>\beta</math>-D-mannopyranosyl)-1-[2-hydroxy-2-(2-oxocyclohexyl)cyclohexyl] (10b)</b> | S-6         | S-21,<br>S-22  |
| <b>2,3-Di-<i>O</i>-benzyl-4,6-<i>O</i>-benzylidene-1-deoxy-1-allyl-<math>\alpha</math>-D-glucopyranose (12)</b>                                | S-6,<br>S-7 | S-23,<br>S-24  |
| <b>2,3-Di-<i>O</i>-benzyl-4,6-<i>O</i>-benzylidene-1-deoxy-1-(3,3-dimethyl-2-oxobutyl)-<math>\alpha</math>-D-glucopyranose (13a)</b>           | S-7         | S-25,<br>S-26  |
| <b>(3,3-Dimethyl-2-buten-2-yl) 2,3-Di-<i>O</i>-benzyl-4,6-<i>O</i>-benzylidene-<math>\alpha</math>-D-glucopyranoside (13b)</b>                 | S-7,<br>S-8 | S-27,<br>S-28  |

**General.** Unless otherwise stated  $^1\text{H}$  and  $^{13}\text{C}$  NMR were recorded in  $\text{CDCl}_3$  solution. Optical rotations were recorded in  $\text{CHCl}_3$  solutions, unless otherwise stated. All organic extracts were dried over sodium sulfate, and concentrated under aspirator vacuum. Chromatographic purifications were carried out over silica gel.

**General Procedure for Glycosylation Using the BSP/TTBP/Tf<sub>2</sub>O System.** To a stirred solution of donor (1 equiv), BSP (1.2 equiv), TTBP (1.5 equiv), and 3 Å molecular sieves in  $\text{CH}_2\text{Cl}_2$  (0.05 M in substrate) at  $-60^\circ\text{C}$  under an argon atmosphere was added  $\text{Tf}_2\text{O}$  (1.2 equiv). After 30 min of stirring at  $-60^\circ\text{C}$ , a solution of the glycosyl acceptor (4.0 equiv) in  $\text{CH}_2\text{Cl}_2$  (0.20 M in acceptor) was slowly added. The reaction mixture was stirred for a further 2 h at  $-60^\circ\text{C}$ , and then the reaction mixture was diluted with  $\text{CH}_2\text{Cl}_2$ , and the molecular sieves were filtered off and washed with saturated  $\text{NaHCO}_3$  solution and brine. The organic layer was separated, dried over  $\text{Na}_2\text{SO}_4$ , and concentrated. Purification by column chromatography on silica gel, eluting with hexanes/ethyl acetate mixtures, afforded the corresponding coupled products.

**2,3-Di-O-benzyl-4,6-O-benzylidene-1-deoxy-1-allyl- $\alpha$ -D-mannopyranose (7 $\alpha$ ) and 2,3-Di-O-benzyl-4,6-O-benzylidene-1-deoxy-1-allyl- $\beta$ -D-mannopyranose (7 $\beta$ ).**

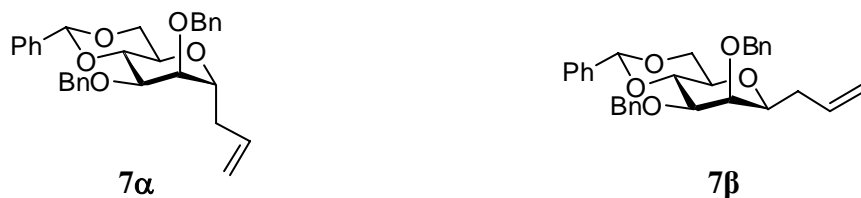

Prepared by the general procedure with a combined yield of 53.0 mg (61%, 1:8  $\alpha/\beta$ ).

**7 $\alpha$ :** Colorless oil;  $[\alpha]_D^{20} +10.4$  ( $c = 0.25$ ,  $\text{CHCl}_3$ );  $^1\text{H}$  NMR (500 MHz,  $\text{CDCl}_3$ )  $\delta$  7.51 (dd,  $J = 1.5, 7.5$  Hz, 2H), 7.40-7.65 (m, 13H), 5.65-5.58 (m, 2H), 5.02 (d,  $J = 10.0$  Hz, 1H), 4.96 (dd,  $J = 1.5, 17.0$  Hz, 1H), 4.81 (d,  $J = 12.5$  Hz, 1H), 4.75 (s, 2H), 4.66 (d,  $J = 12.5$  Hz, 1H), 4.28 (t,  $J = 10.0$  Hz, 1H), 4.21 (dd,  $J = 5.0, 10.5$  Hz, 1H), 4.05 (t,  $J = 8.0$

Hz, 1H), 3.86–3.82 (m, 2H), 3.70 (d,  $J = 1.5$  Hz, 1H), 3.69–3.6 (m, 1H), 2.45–2.41 (m, 1H), 2.21–2.17 (m, 1H);  $^{13}\text{C}$  NMR (125.9 MHz,  $\text{CDCl}_3$ )  $\delta$  138.5, 138.2, 137.7, 133.4, 128.8, 128.4, 128.3, 128.2, 127.7, 127.7, 126.0, 117.9, 101.4, 79.6, 76.3, 75.5, 72.9, 72.8, 69.2, 65.8, 33.8; ESI-HRMS calcd for  $\text{C}_{30}\text{H}_{32}\text{O}_5\text{Na}$   $[\text{M} + \text{Na}]^+$ , 495.2142; found, 495.2127. **7 $\beta$** : Colorless oil;  $[\alpha]_D^{20}$   $-20.2$  ( $c = 0.9$ ,  $\text{CHCl}_3$ );  $^1\text{H}$  NMR (500 MHz,  $\text{CDCl}_3$ )  $\delta$  7.51 (d,  $J = 7.0$  Hz, 2H), 7.41–7.25 (m, 13H), 5.68–5.63 (m, 2H), 5.09–5.01 (m, 3H), 4.93 (d,  $J = 12.5$  Hz, 1H), 4.77 (d,  $J = 12.5$  Hz, 1H), 4.70 (d,  $J = 11.5$  Hz, 1H), 4.30–4.23 (m, 2H), 3.85 (t,  $J = 5$  Hz, 1H), 3.81 (d,  $J = 3.0$  Hz, 1H), 3.73 (dd,  $J = 2.5, 7.0$  Hz, 1H), 3.45 (dd,  $J = 7.0, 7.5$  Hz, 1H), 3.41–3.36 (m, 1H), 2.45 (dd,  $J = 7.0, 14.0$  Hz, 1H), 2.27 (dd,  $J = 7.5, 14.0$  Hz, 1H);  $^{13}\text{C}$  NMR (125.9 MHz,  $\text{CDCl}_3$ )  $\delta$  138.7, 138.4, 137.7, 134.2, 128.8, 128.5, 128.4, 128.3, 128.2, 127.7, 127.6, 127.5, 126.1, 117.5, 101.4, 80.8, 79.7, 79.6, 76.4, 75.0, 73.2, 71.9, 68.7, 35.5; ESI-HRMS calcd for  $\text{C}_{30}\text{H}_{32}\text{O}_5\text{Na}$   $[\text{M} + \text{Na}]^+$ , 495.2142; found, 495.2121. The  $^1\text{H}$ -NMR data for compound **7 $\beta$**  do not match that reported in the literature for this compound (Terauchi, M.; Abe, H.; Matsuda, A.; Shuto, S. *Org. Lett.* **2004**, *6*, 3751–3754). It is not clear why this is at the present time.

**2,3-Di-*O*-benzyl-4,6-*O*-benzylidene-1-deoxy-(3,3-dimethyl-2-oxo-butyl)- $\beta$ -D-mannopyranose (8a) and (3,3-dimethyl-2buten-2-yl) 2,3-Di-*O*-benzyl-4,6-*O*-benzylidene- $\alpha$ -D-mannopyranoside (8b).**

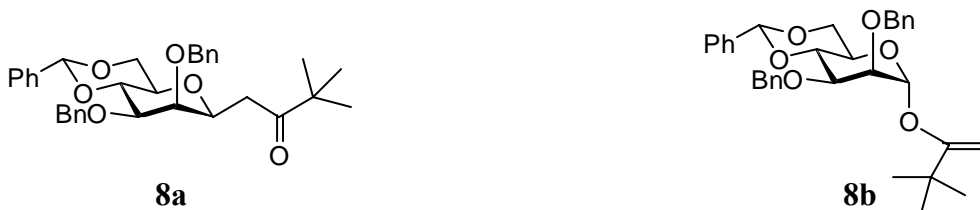

Prepared by the general procedure with a combined yield of 62.0 mg (63%, 7:1 8a/8b). **8a**: Colorless oil;  $[\alpha]_D^{20}$   $-1.5$  ( $c = 1.0$ ,  $\text{CHCl}_3$ );  $^1\text{H}$  NMR (500 MHz,  $\text{C}_6\text{D}_6$ )  $\delta$  7.7 (d,  $J = 3.0$  Hz, 2H), 7.48 (d,  $J = 7.5$  Hz, 4H), 7.30–7.17 (m, 9H), 5.41 (s, 1H), 5.28 (d,  $J = 11.5$  Hz, 1H), 5.00 (d,  $J = 12.0$  Hz, 1H), 4.72 (d,  $J = 12.5$  Hz, 1H), 4.60 (d,  $J = 11.5$  Hz, 1H), 4.42 (t,  $J = 9.5$  Hz, 1H), 4.27 (dd,  $J = 5.0, 10.0$  Hz, 1H), 4.03 (t,  $J = 6.5$  Hz, 1H), 3.90 (d,  $J = 2.0$  Hz, 1H), 3.72–3.66 (m, 2H), 3.43–3.36 (m, 1H), 3.00 (dd,  $J = 6.0, 17.5$  Hz, 1H), 2.58 (dd,  $J = 6.0, 17.5$  Hz, 1H), 1.02 (s, 9H);  $^{13}\text{C}$  NMR (125.9 MHz,  $\text{C}_6\text{D}_6$ )  $\delta$  211.7,

139.4, 139.2, 138.6, 128.6, 128.4, 128.3, 128.02, 127.8, 127.6, 127.5, 126.5, 101.5, 80.9, 79.9, 77.9, 75.6, 75.5, 75.4, 71.8, 68.7, 43.7, 38.2, 26.1; ESI-HRMS calcd for  $C_{33}H_{38}O_6Na [M + Na]^+$ , 553.2560; found, 553.2552.

**8b:** Colorless oil;  $[\alpha]_D^{20} +21.5(c = 0.7, CHCl_3)$ ;  $^1H$  NMR (500 MHz,  $C_6D_6$ )  $\delta$  7.70 (d,  $J = 8.0$  Hz, 2H), 7.49(d,  $J = 8.0$  Hz, 2H), 7.44(d,  $J = 7.5$  Hz, 2H), 7.29–7.18 (m, 9H), 5.56 (s, 1H), 5.44 (s, 1H), 5.02 (d,  $J = 12.0$  Hz, 1H), 4.88 (d,  $J = 11.5$  Hz, 1H), 4.75 (d,  $J = 12.5$  Hz, 1H), 4.63–4.58(m, 2H), 4.50 (d,  $J = 2.5$  Hz, 1H), 4.30–4.27(m, 2H), 4.24 (d,  $J = 2.5$  Hz, 1H), 4.13–4.06 (m, 1H), 3.95 (s, 1H), 3.72 (t,  $J = 10.0$  Hz, 1H), 1.11 (s, 9H);  $^{13}C$  NMR (125.9 MHz,  $C_6D_6$ )  $\delta$  167.5, 139.1, 138.7, 138.4, 128.6, 128.3, 128.3, 128.1, 128.0, 127.8, 127.6, 127.5, 126.5, 101.7, 96.7, 82.6, 79.5, 77.8, 76.3, 73.9, 73.4, 68.8, 65.6, 35.7, 28.1; ESI-HRMS calcd for  $C_{33}H_{38}O_6Na [M + Na]^+$ , 553.2561; found, 553.2564.

**2,3-Di-*O*-benzyl-4,6-*O*-benzylidene-1-deoxy-1-(2-oxo-2-phenylethyl)- $\beta$ -D-mannopyranose (9).**

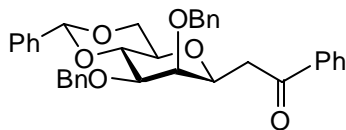

Prepared by the general procedure with a yield of 81.0 mg (80 %). Colorless oil;  $[\alpha]_D^{20} -6.8(c = 1.0, CHCl_3)$ ;  $^1H$  NMR (500 MHz,  $C_6D_6$ )  $\delta$  7.92 (d,  $J = 6.0$  Hz, 2H), 7.70(d,  $J = 7.0$  Hz, 2H), 7.50(d,  $J = 7.0$  Hz, 2H), 7.39(d,  $J = 7.0$  Hz, 2H), 7.29–7.08 (m, 12H), 5.42 (s, 1H), 5.22 (d,  $J = 11.0$  Hz, 1H), 5.00 (d,  $J = 12.5$  Hz, 1H), 4.72 (d,  $J = 12.0$  Hz, 1H), 4.58 (d,  $J = 11.0$  Hz, 1H), 4.46(t,  $J = 9.5$  Hz, 1H), 4.25 (dd,  $J = 5.0, 10.5$  Hz, 1H), 4.16 (dt,  $J = 1.0, 6.5$  Hz, 1H), 4.04 (d,  $J = 1.0$  Hz, 1H), 3.74 (dd,  $J = 3.0, 10.0$  Hz, 1H), 3.69 (t,  $J = 10$  Hz, 1H), 3.44–3.39 (m, 1H), 3.32 (dd,  $J = 5.0, 17.0$  Hz, 1H), 3.20 (dd,  $J = 7.0, 18.0$  Hz, 1H);  $^{13}C$  NMR (125.9 MHz,  $C_6D_6$ )  $\delta$  196.7, 139.4, 139.0, 138.7, 132.7, 128.6, 128.5, 128.4, 128.3, 128.1, 128.0, 127.8, 127.6, 127.4, 126.4, 101.5, 80.9, 79.8, 77.7, 75.8, 75.6, 73.3, 71.8, 68.7, 39.8; ESI-HRMS calcd for  $C_{35}H_{34}O_6Na [M + Na]^+$ , 551.2428; found, 551.2382.

(2,3-Di-*O*-benzyl-4,6-*O*-benzylidene)-1*S*-1-(2-oxo-cyclohexyl)-1-deoxy- $\beta$ -D-mannopyranose (**10a**) and (2,3-Di-*O*-benzyl-4,6-*O*-benzylidene- $\beta$ -D-mannopyranosyl)-1-[2-hydroxy-2-(2-oxocyclohexyl)cyclohexyl] (**10b**).

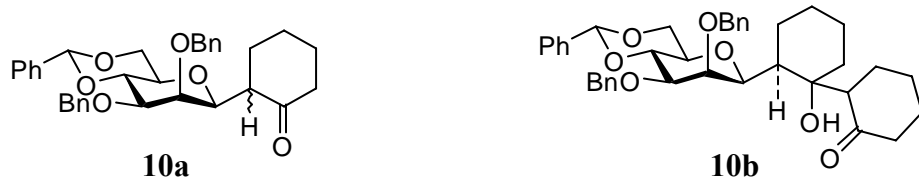

Prepared by the general procedure with a combined yield of 49.0 mg (51 %, 2:1 10a/10b). **10a** : Colorless oil;  $[\alpha]_D^{23}$   $-3.14$  ( $c = 0.4$ ,  $\text{CHCl}_3$ );  $^1\text{H NMR}$  (500 MHz,  $\text{CDCl}_3$ )  $\delta$  7.51 (d,  $J = 1.0$  Hz, 2H), 7.41–7.26 (m, 13H), 5.64 (s, 1H), 4.97 (d,  $J = 12.0$  Hz, 1H), 4.94 (d,  $J = 13$  Hz, 1H), 4.80 (d,  $J = 12.5$  Hz, 1H), 4.58 (d,  $J = 12.0$  Hz, 1H), 4.26–4.19 (m, 3H), 3.85–3.81 (m, 2H), 3.60 (d,  $J = 9.5$  Hz, 1H), 3.38–3.34 (m, 1H), 2.77–2.73 (m, 1H), 2.42–2.37 (m, 1H), 2.10 (d,  $J = 1.5$  Hz, 1H), 2.08 (s, 1H), 2.00–1.96 (m, 2H), 1.86–1.81 (m, 1H), 1.58–1.51 (m, 1H), 1.27–1.21 (m, 1H);  $^{13}\text{C NMR}$  (125.9 MHz,  $\text{C}_6\text{D}_6$ )  $\delta$  212.0, 138.7, 138.4, 137.7, 129.0, 128.7, 128.4, 128.3, 128.1, 127.8, 127.5, 126.1, 101.4, 80.7, 79.5, 78.0, 75.4, 75.1, 73.3, 71.9, 68.6, 50.1, 42.7, 31.3, 28.6, 25.0; ESI-HRMS calcd for  $\text{C}_{33}\text{H}_{36}\text{O}_6\text{Na}$   $[\text{M} + \text{Na}]^+$ , 529.2585; found, 529.2558.

We assign the stereochemistry of the newly formed stereodiad in **10a** as cis-anti in accordance with the work of Rovis (Frein, D. J.; Rovis, T. *Tetrahedron* **2006**, 62, 4573). This configuration arises from a staggered anticlinal approach of the enol ether to the  $\beta$ -face of the oxacarbenium ion.

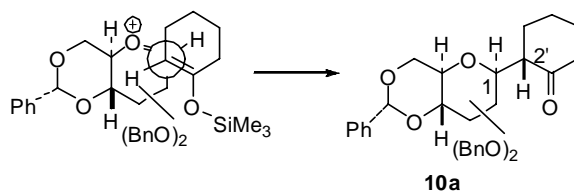

In **10a** the  $^3J_{H1,H2'}$  coupling constant is  $\sim 9.7$  Hz consistent with the anti relationship of these two hydrogens in the predominant conformation. The cyclohexanone ring adopts an apparent twist boat conformation as determined by noe interactions and a strong  $^4J_w$  type coupling across the carbonyl group. As such the conformation of **10a** about the newly formed C-C bond is significantly different to that reported by Kunz for the related molecule **A** in which the  $^3J_{1,2'}$  is 1.98 Hz. (Kunz, H.; Müller, B.; Weissmüller, J. *Carbohydr. Res.* **1987**, *171*, 25-34).

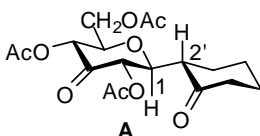

**10b** : Colorless oil;  $[\alpha]_D^{23} -12.0$  ( $c = 0.2$ ,  $\text{CHCl}_3$ );  $^1\text{H NMR}$  (500 MHz,  $\text{C}_6\text{D}_6$ )  $\delta$  7.73 (d,  $J = 7.0$  Hz, 2H), 7.50–7.19 (m, 13H), 5.40 (s, 1H), 5.21 (d,  $J = 11.5$  Hz, 1H), 5.03 (d,  $J = 11.0$  Hz, 1H), 4.89 (d,  $J = 12.0$  Hz, 1H), 4.70 (d,  $J = 12.5$  Hz, 1H), 4.55 (s, 1H), 4.38 (t,  $J = 9.5$  Hz, 1H), 4.22 (dd,  $J = 5.0, 10.0$  Hz, 1H), 3.98 (d,  $J = 3.0$  Hz, 1H), 3.69 (t,  $J = 10.0$  Hz, 1H), 3.56–3.53 (m, 1H), 3.18–3.16 (m, 1H), 2.77–2.73 (m, 1H), 2.44–2.29 (m, 2H), 2.02–2.00 (m, 1H), 1.82–1.33 (m, 14H), 1.01 (s, 1H);  $^{13}\text{C NMR}$  (125.9 MHz,  $\text{C}_6\text{D}_6$ )  $\delta$  210.3, 139.6, 139.2, 138.5, 128.0, 127.8, 127.6, 126.4, 101.6, 96.5, 79.5, 79.0, 78.8, 75.7, 72.4, 68.7, 67.3, 58.6, 44.1, 31.0, 29.8, 29.5, 28.8, 28.6, 25.9, 25.7, 22.3, 21.9. ESI-HRMS calcd for  $\text{C}_{39}\text{H}_{46}\text{O}_7\text{Na}$   $[\text{M} + \text{Na}]^+$ , 649.3141; found, 649.3080.

The stereochemistry at C2' in **10b** is assigned by analogy to **10a**. The configuration of the tertiary alcohol in **10b** remains unclear at this time.

### 2,3-Di-*O*-benzyl-4,6-*O*-benzylidene-1-deoxy-1-allyl- $\alpha$ -D-glucopyranose (**12**).

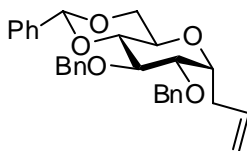

Prepared by the general procedure with a yield of 49.0 mg (54 %). Colorless oil;  $[\alpha]_D^{22} +1.5$  ( $c = 1.0$ ,  $\text{CHCl}_3$ );  $^1\text{H NMR}$  (500 MHz,  $\text{CDCl}_3$ )  $\delta$  7.50 (dd,  $J = 2.0, 7.5$  Hz, 2H), 7.33–7.26 (m, 13H), 5.81–5.75 (m, 1H), 5.58 (s, 1H), 5.16–5.09 (m, 2H), 4.93 (d,  $J = 11.5$  Hz, 1H), 4.82 (d,  $J = 11.5$  Hz, 1H), 4.78 (d,  $J = 11.5$  Hz, 1H), 4.65 (d,  $J = 12.0$  Hz,

1H), 4.26–4.24 (m, 1H), 4.09 (dd,  $J = 7.5, 13.5$  Hz, 1H), 3.90–3.87 (m, 1H), 3.77 (dd,  $J = 6.0, 8.5$  Hz, 1H), 3.69–3.65 (m, 3H), 2.54 (t,  $J = 7.0$  Hz, 2H);  $^{13}\text{C}$  NMR (125.9 MHz,  $\text{CDCl}_3$ )  $\delta$  138.7, 138.2, 137.5, 134.3, 128.9, 128.5, 128.4, 128.3, 128.0, 127.9, 127.8, 127.6, 126.0, 117.3, 101.2, 82.8, 79.5, 78.8, 74.9, 74.9, 73.6, 69.5, 63.5, 30.7; ESI-HRMS calcd for  $\text{C}_{30}\text{H}_{32}\text{O}_5\text{Na}$   $[\text{M} + \text{Na}]^+$ , 495.2142; found, 495.2134.

**2,3-Di-*O*-benzyl-4,6-*O*-benzylidene-1-deoxy-1-(3,3-dimethyl-2-oxo-butyl)- $\alpha$ -D-glucopyranose (13a).**

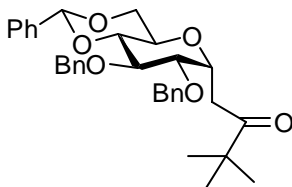

Prepared by the general procedure with a yield of 20.0 mg (22 %). Colorless oil;  $[\alpha]_D^{20} +11.16$  ( $c = 0.6$ ,  $\text{CHCl}_3$ );  $^1\text{H}$  NMR (500 MHz,  $\text{C}_6\text{D}_6$ )  $\delta$  7.76 (d,  $J = 7.5$  Hz, 2H), 7.54 (d,  $J = 7.5$  Hz, 2H), 7.38–7.14 (m, 11H), 5.45 (s, 1H), 5.24 (dd,  $J = 6.0, 12.5$  Hz, 1H), 5.13 (d,  $J = 12.0$  Hz, 1H), 5.00 (d,  $J = 12.0$  Hz, 1H), 4.60 (d,  $J = 11.0$  Hz, 1H), 4.54 (d,  $J = 11.0$  Hz, 1H), 4.27 (dd,  $J = 5.0, 10.0$  Hz, 1H), 3.90 (t,  $J = 9.0$  Hz, 1H), 3.81 (dd,  $J = 6.0, 9.0$  Hz, 1H), 3.74–3.69 (m, 1H), 3.64 (dd,  $J = 9.0, 9.5$  Hz, 1H), 3.57 (t,  $J = 10.0$  Hz, 1H), 2.93 (dd,  $J = 6.0, 16.5$  Hz, 1H), 2.61 (dd,  $J = 6.5, 16.5$  Hz, 1H), 0.96 (s, 9H);  $^{13}\text{C}$  NMR (125.9 MHz,  $\text{C}_6\text{D}_6$ )  $\delta$  210.3, 139.2, 138.3, 138.2, 128.8, 128.3, 128.3, 128.1, 128.0, 127.8, 127.6, 126.3, 101.3, 82.8, 79.3, 78.5, 74.3, 73.6, 71.8, 69.4, 65.0, 43.9, 34.4, 25.8; ESI-HRMS calcd for  $\text{C}_{33}\text{H}_{38}\text{O}_6\text{Na}$   $[\text{M} + \text{Na}]^+$ , 553.2561; found, 553.2563.

**(3,3-Dimethyl-2-buten-2-yl)**  
**2,3-Di-*O*-benzyl-4,6-*O*-benzylidene- $\alpha$ -D-glucopyranoside (13b).**

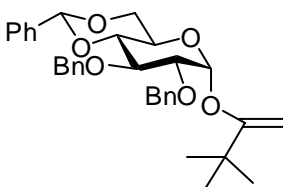

Prepared by the general procedure with a yield of 30.0 mg (33 %). Colorless oil;  $[\alpha]_D^{20} +11.69$  ( $c = 0.65$ ,  $\text{CHCl}_3$ );  $^1\text{H}$  NMR (500 MHz,  $\text{CDCl}_3$ )  $\delta$  7.50 (dd,  $J = 1.5, 7.5$  Hz, 2H),

7.40–7.26 (m, 13H), 5.57 (s, 1H), 5.32 (d,  $J = 3.5$  Hz, 1H), 4.94 (d,  $J = 11.5$  Hz, 1H), 4.87 (d,  $J = 11.0$  Hz, 1H), 4.73 (d,  $J = 11.5$  Hz, 1H), 4.67 (d,  $J = 12.0$  Hz, 1H), 4.26 (dd,  $J = 5.0, 10.0$  Hz, 1H), 4.21 (d,  $J = 2.5$  Hz, 1H), 4.11 (d,  $J = 2.5$  Hz, 1H), 4.08 (dd,  $J = 9.0, 9.5$  Hz, 1H), 3.82–3.77 (m, 1H), 3.70 (d,  $J = 10.5$  Hz, 1H), 3.67–3.63 (m, 2H), 1.16 (s, 9H);  $^{13}\text{C}$  NMR (125.9 MHz,  $\text{CDCl}_3$ )  $\delta$  168.9, 138.8, 137.4, 128.9, 128.4, 128.3, 128.3, 128.0, 127.6, 127.6, 126.0, 101.2, 94.9, 82.2, 82.1, 79.6, 78.5, 75.3, 73.0, 69.2, 63.0, 36.2, 28.3; ESI-HRMS calcd for  $\text{C}_{33}\text{H}_{38}\text{O}_6\text{Na}$   $[\text{M} + \text{Na}]^+$ , 553.2561; found, 553.2553.



2,3-Di-*O*-benzyl-4,6-*O*-benzylidene-1-deoxy-1-allyl- $\beta$ -D-mannopyranose (**7 $\beta$** )

$^1\text{H}$  NMR (500 MHz,  $\text{CDCl}_3$ )

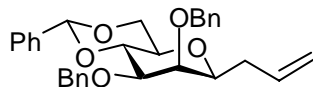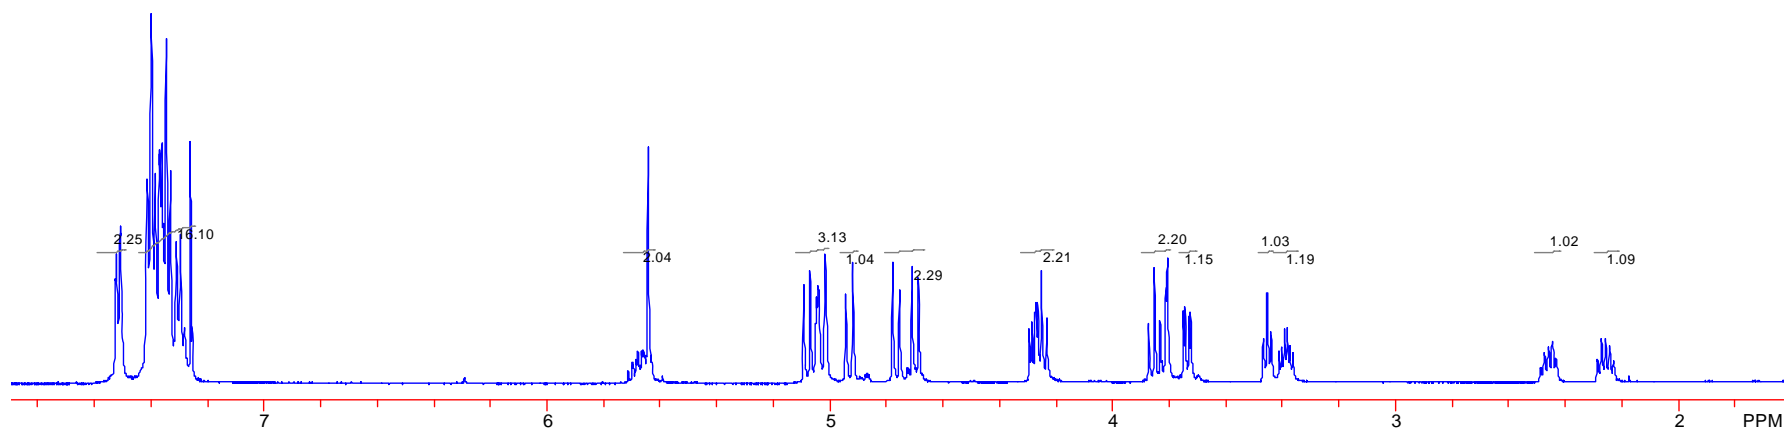

2,3-Di-*O*-benzyl-4,6-*O*-benzylidene-1-deoxy-1-allyl- $\beta$ -D-mannopyranose (**7 $\beta$** )

$^{13}\text{C}$  NMR (125.9 MHz,  $\text{CDCl}_3$ )

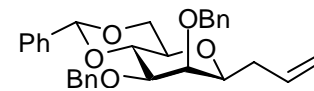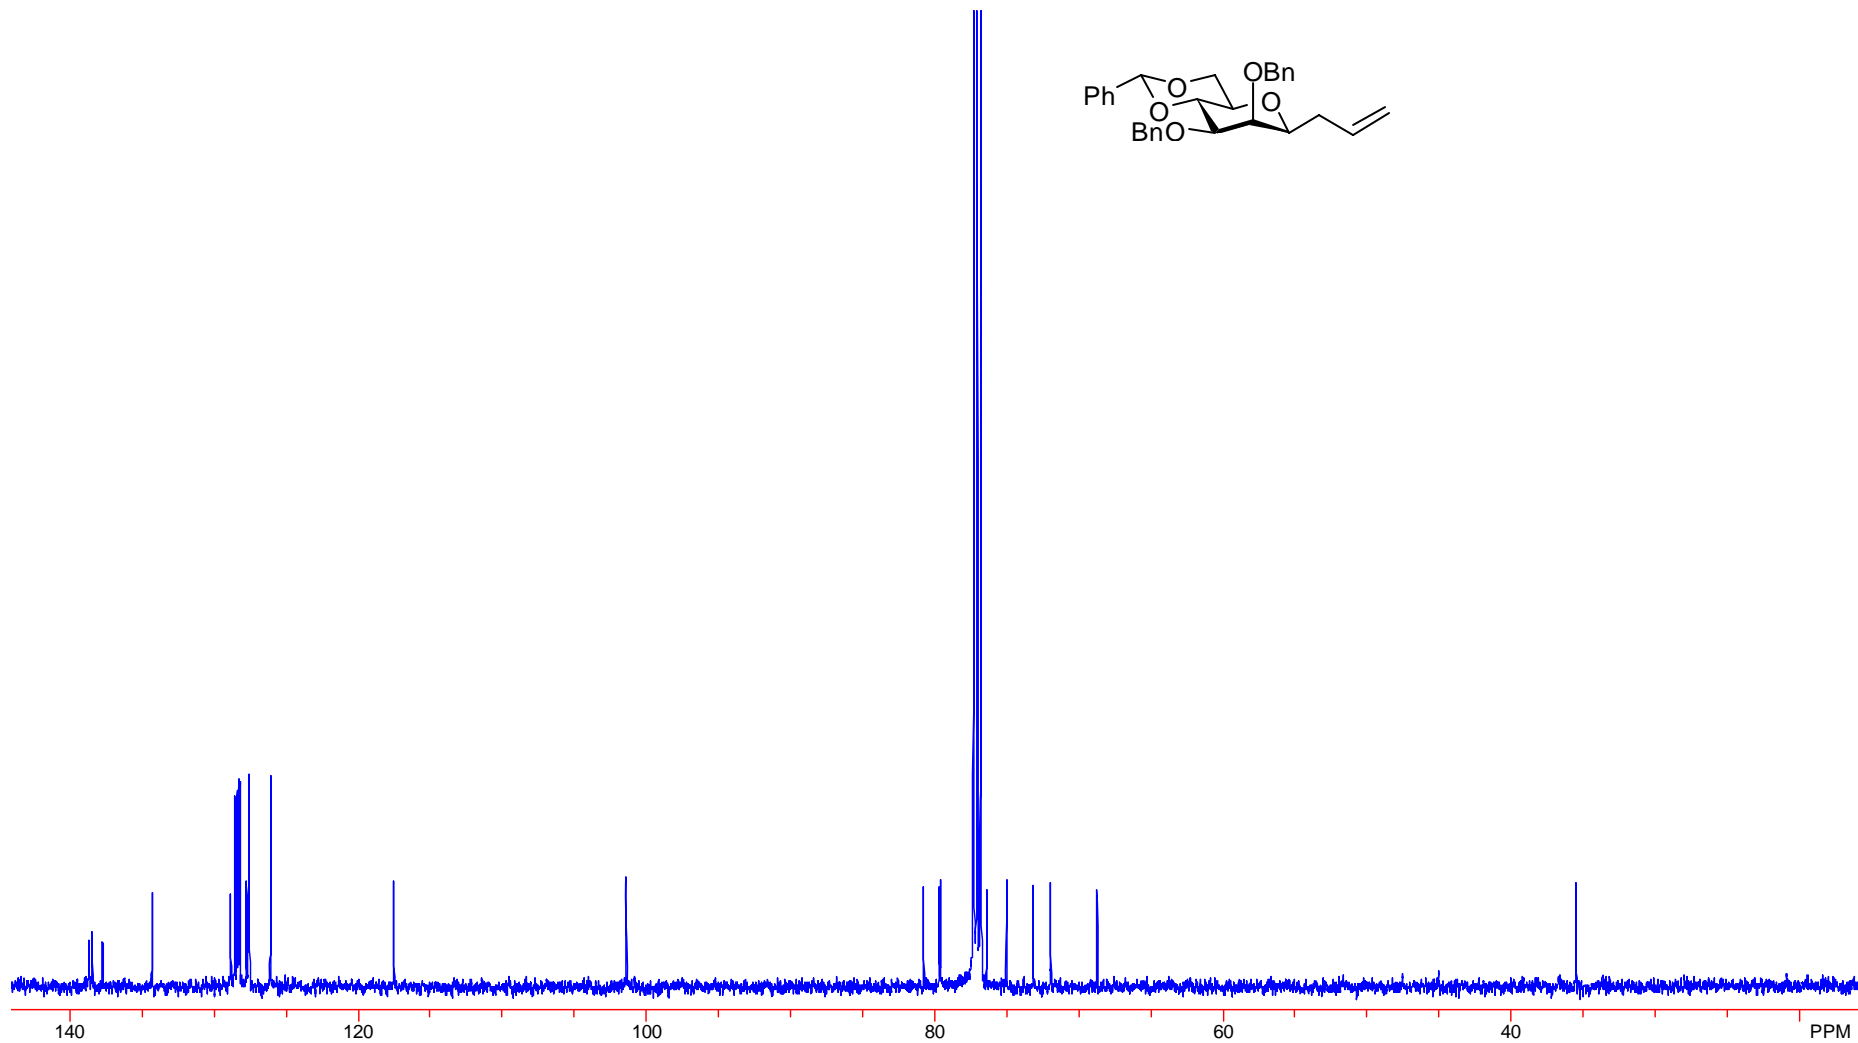

2,3-Di-*O*-benzyl-4,6-*O*-benzylidene-1-deoxy-1-allyl- $\alpha$ -D-mannopyranose (**7 $\alpha$** )

$^1\text{H}$  NMR (500 MHz,  $\text{CDCl}_3$ )

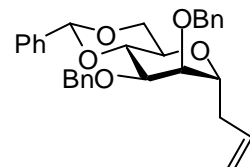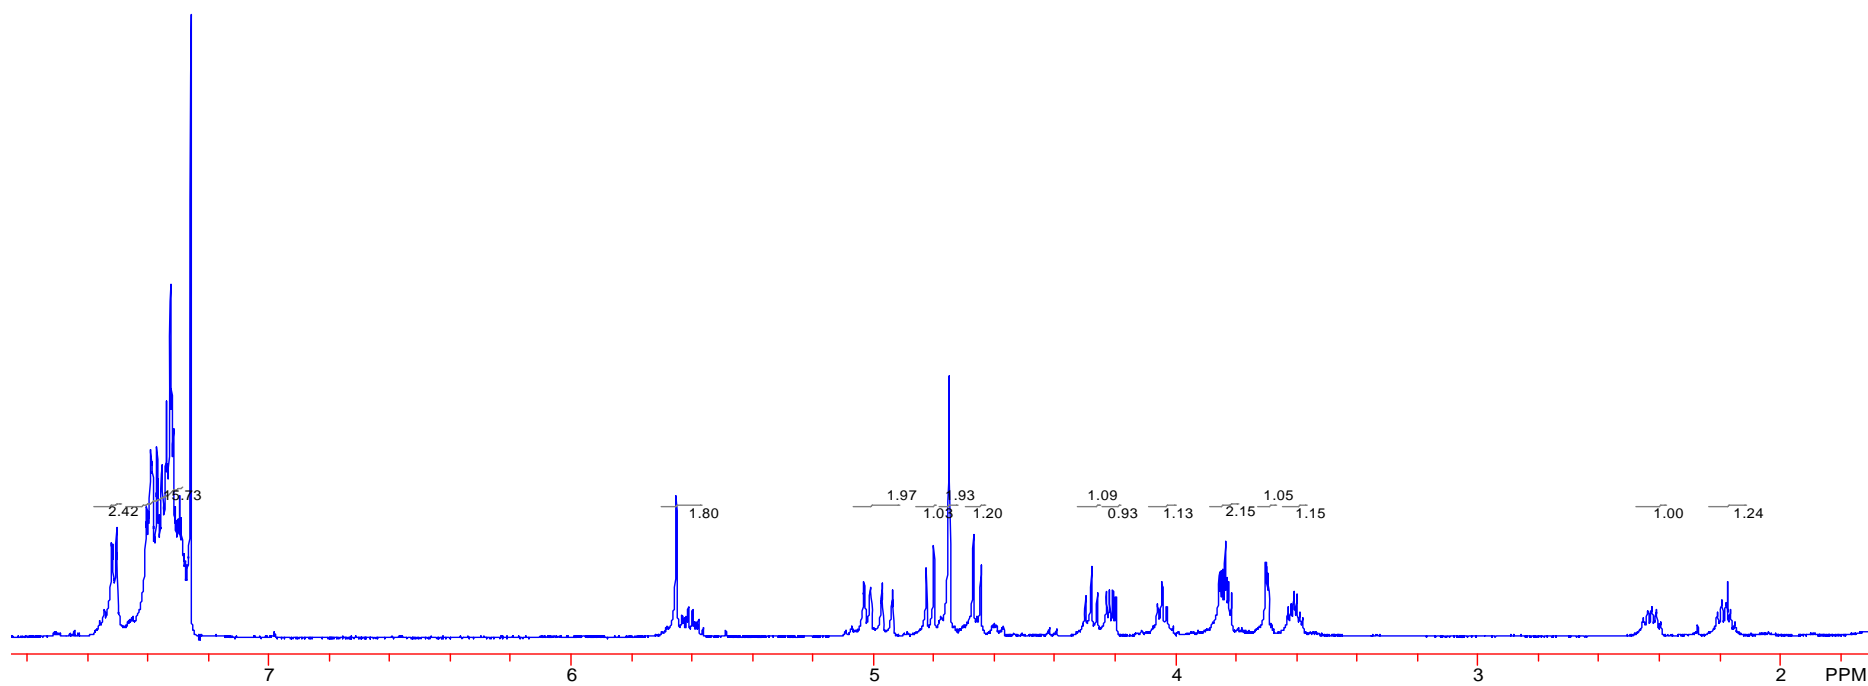

2,3-Di-*O*-benzyl-4,6-*O*-benzylidene-1-deoxy-1-allyl- $\alpha$ -D-mannopyranose (**7 $\alpha$** )

$^{13}\text{C}$  NMR (125.9 MHz,  $\text{CDCl}_3$ )

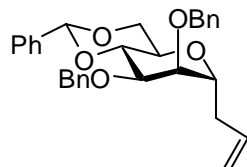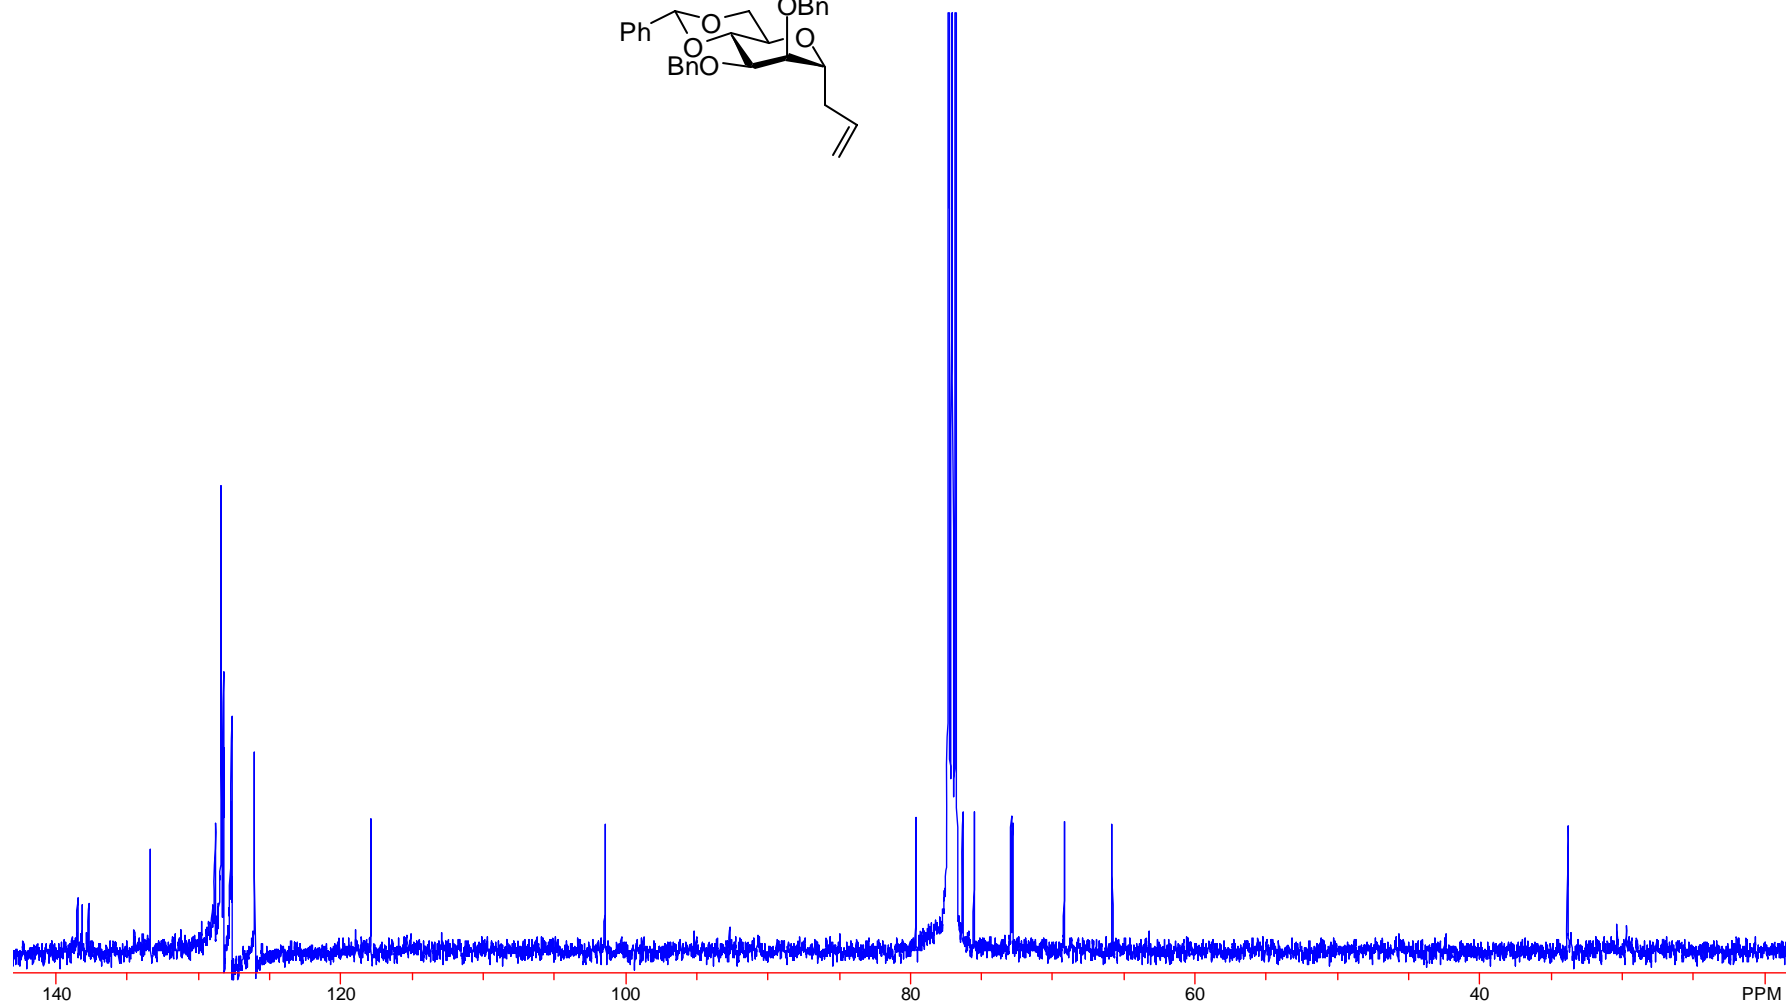

2,3-Di-*O*-benzyl-4,6-*O*-benzylidene-1-deoxy-(3,3-dimethyl-2-oxo-butyl)- $\beta$ -D-mannopyranose (8a)

$^1\text{H}$  NMR (500 MHz,  $\text{C}_6\text{D}_6$ )

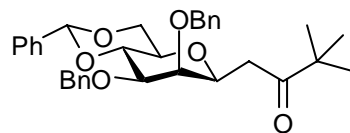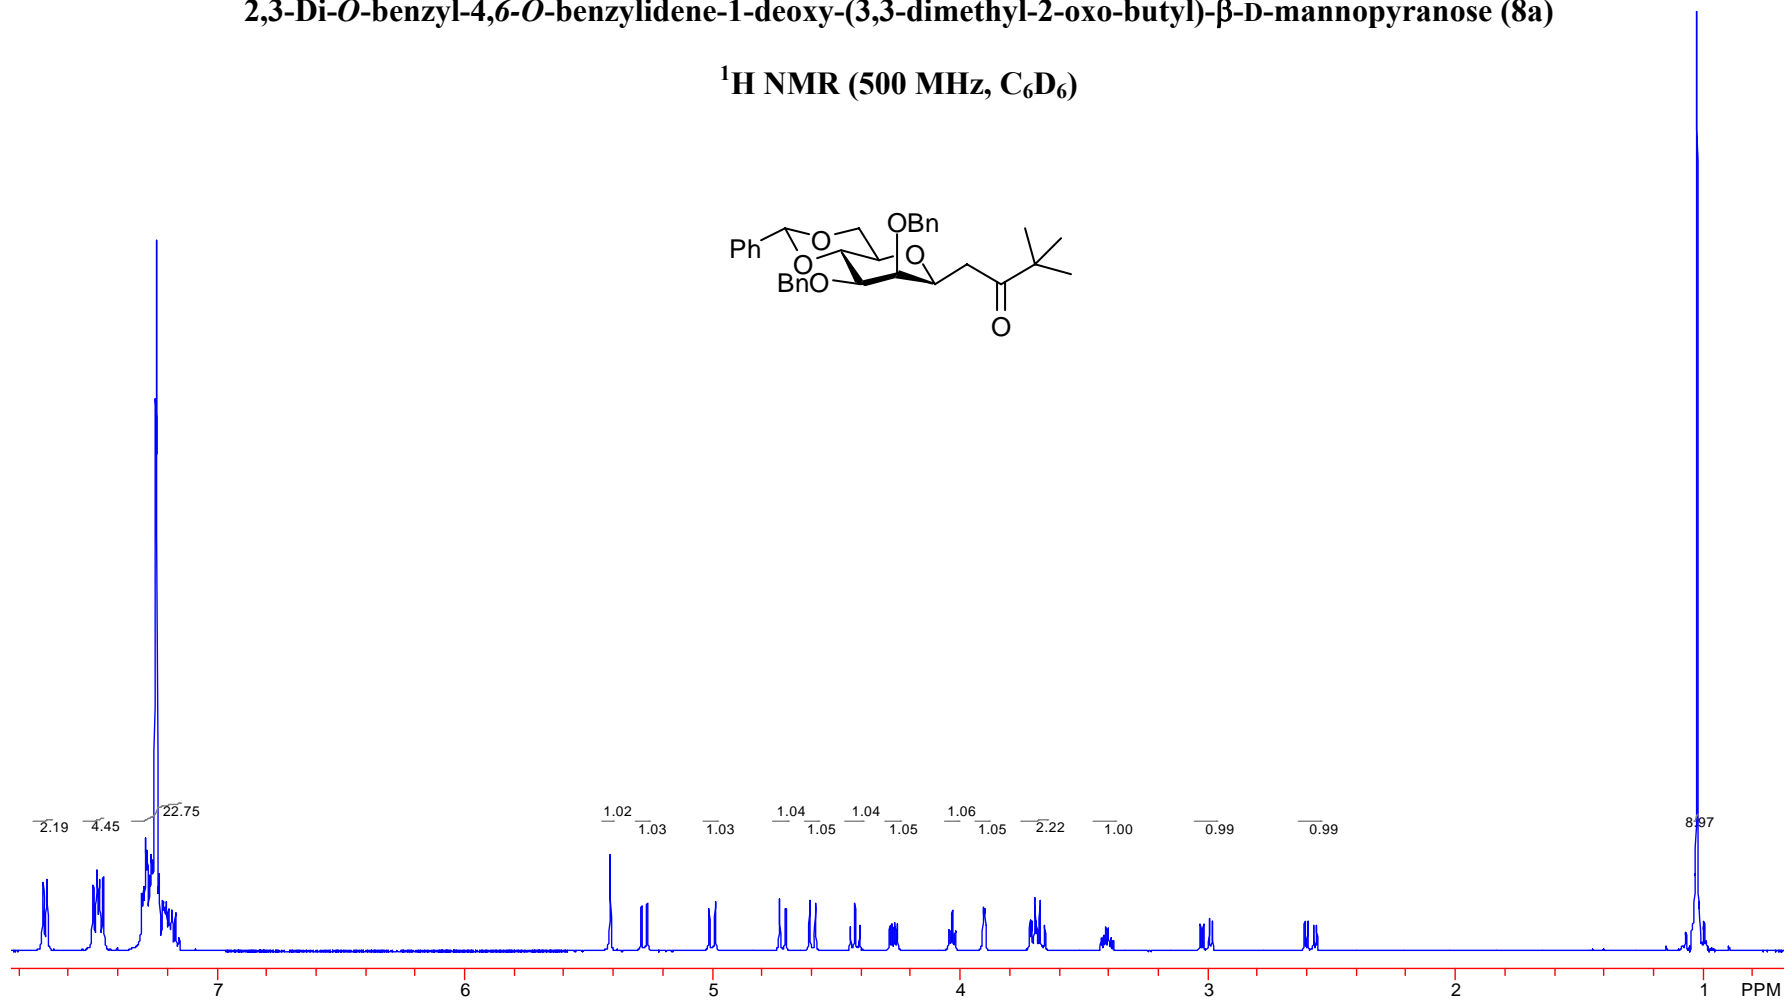

2,3-Di-*O*-benzyl-4,6-*O*-benzylidene-1-deoxy-(3,3-dimethyl-2-oxo-butyl)- $\beta$ -D-mannopyranose (**8a**)

$^{13}\text{C}$  NMR (125.9 MHz,  $\text{C}_6\text{D}_6$ )

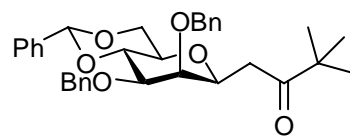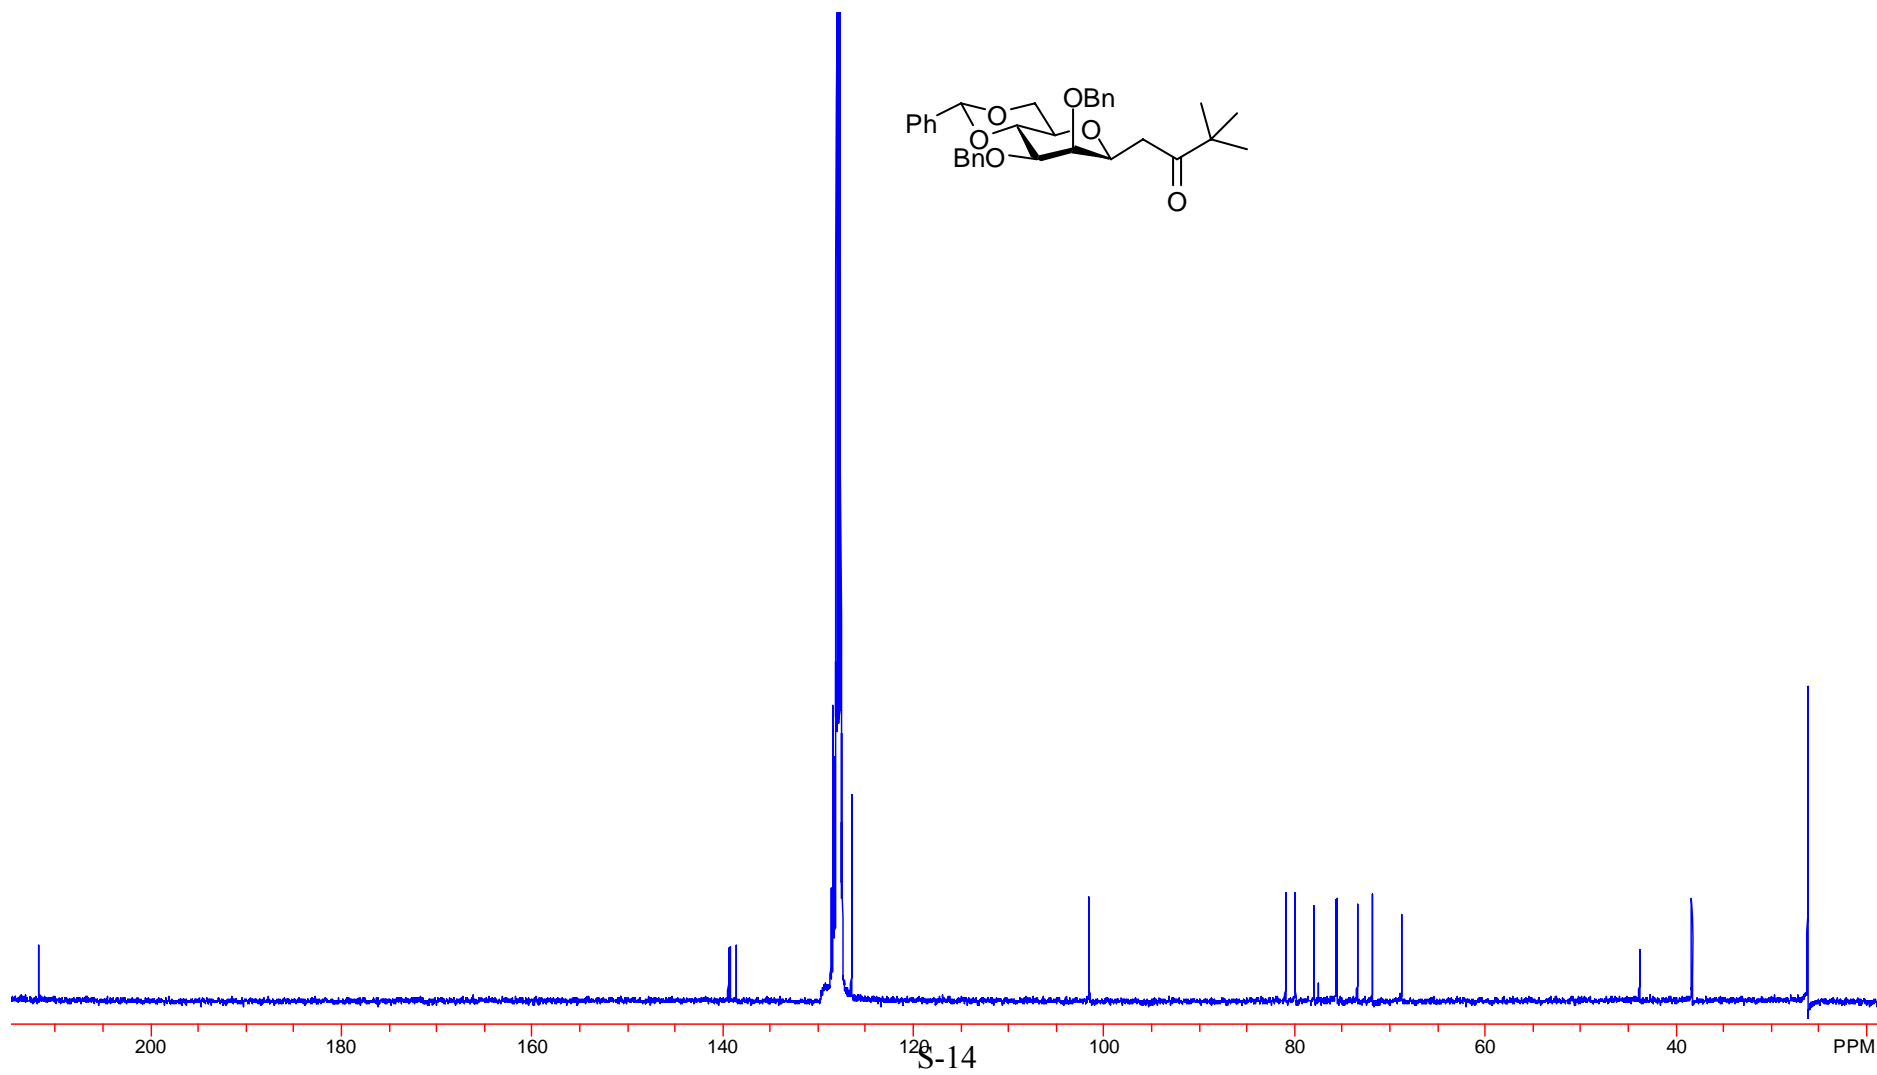

(3,3-dimethyl-2buten-2-yl) 2,3-Di-O-benzyl-4,6-O-benzylidene- $\alpha$ -D-mannopyranoside (8b)

$^1\text{H}$  NMR (500 MHz,  $\text{C}_6\text{D}_6$ )

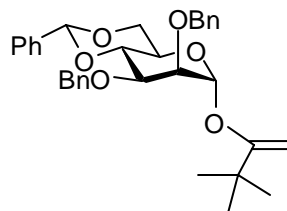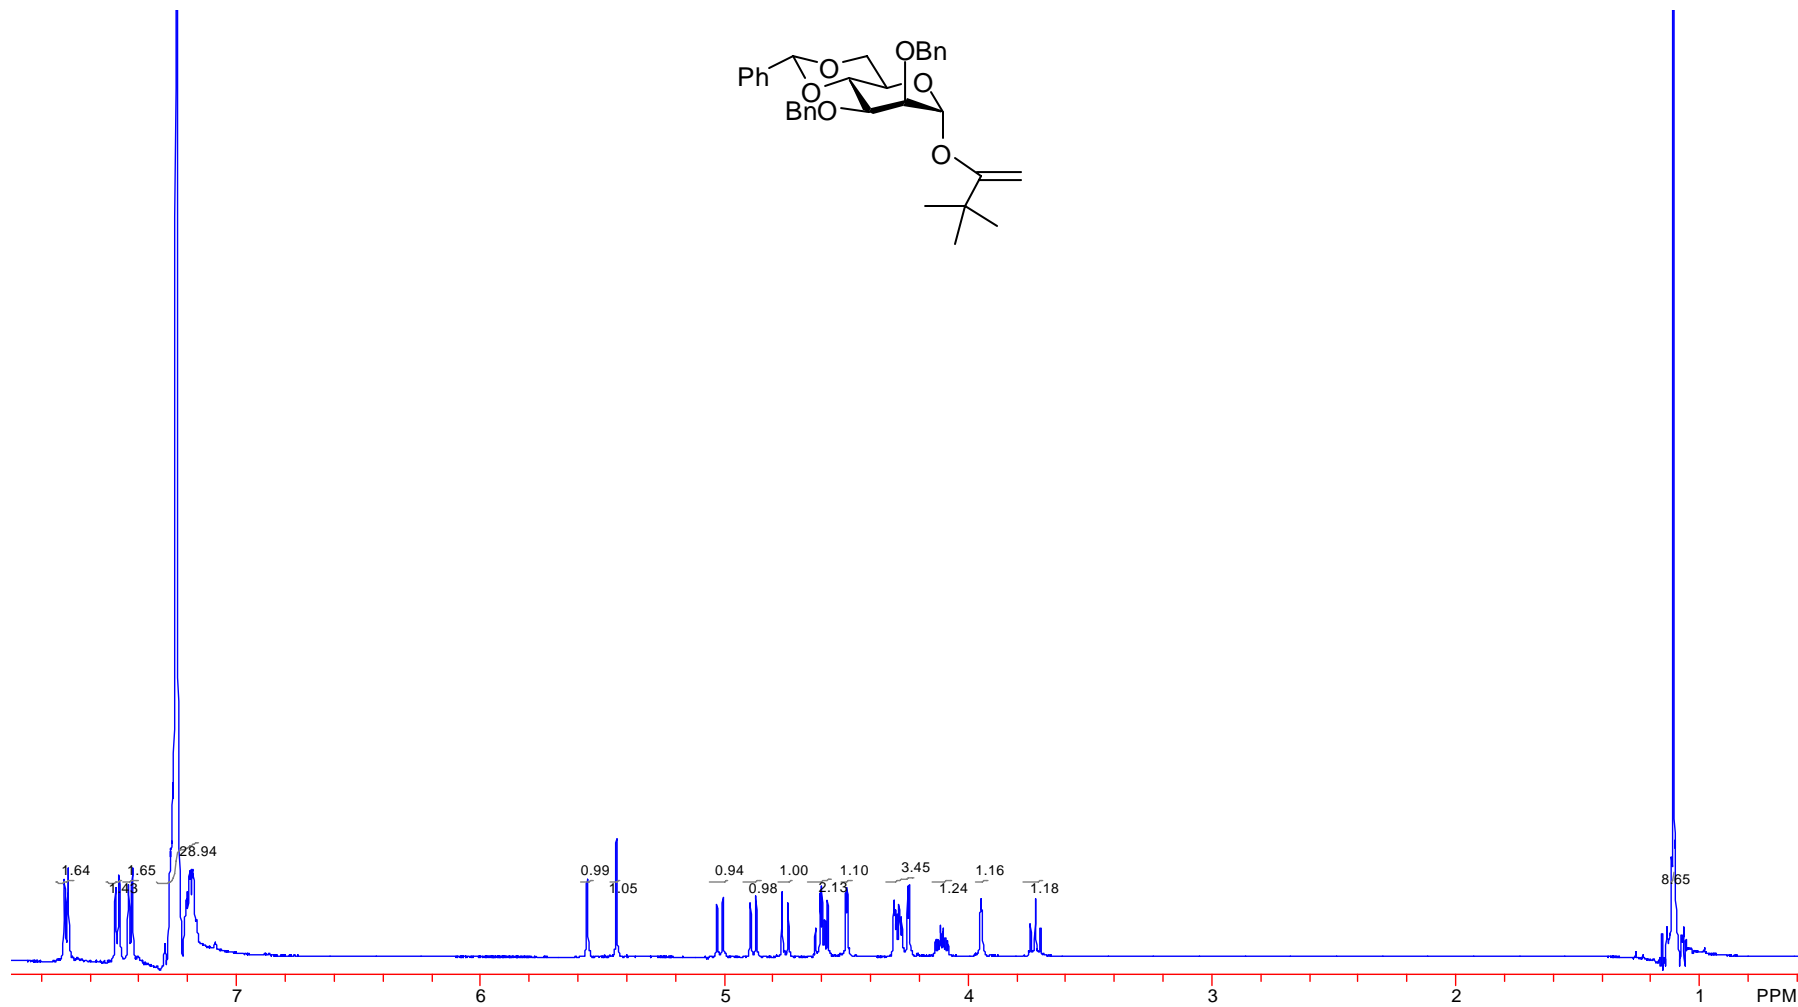

(3,3-dimethyl-2buten-2-yl) 2,3-Di-O-benzyl-4,6-O-benzylidene- $\alpha$ -D-mannopyranoside (8b)

$^{13}\text{C}$  NMR (125.9 MHz,  $\text{C}_6\text{D}_6$ )

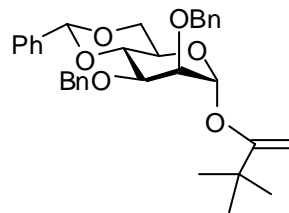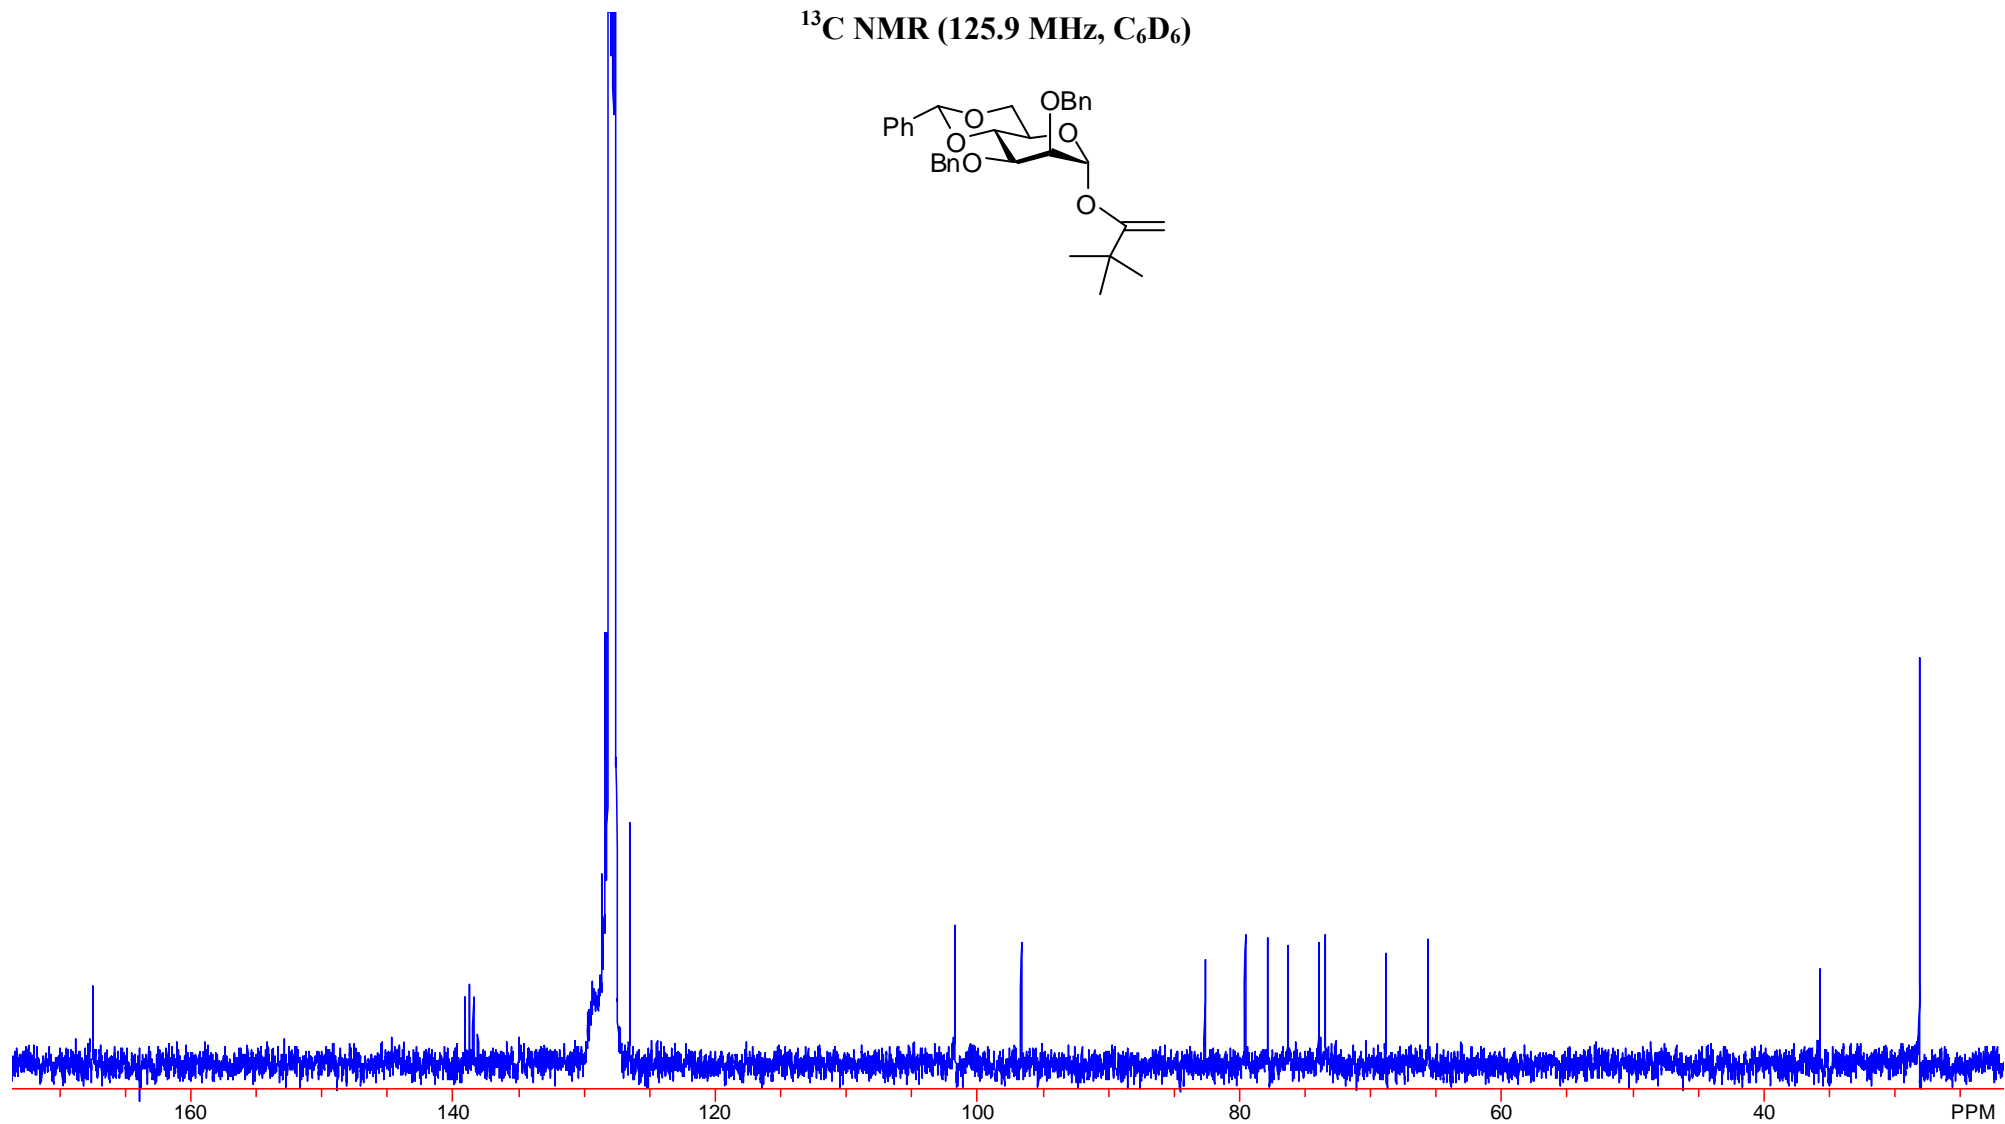



2,3-Di-O-benzyl-4,6-O-benzylidene-1-deoxy-1-(2-oxo-2-phenylethyl)- $\beta$ -D-mannopyranose (9)

$^1\text{H}$  NMR (500 MHz,  $\text{C}_6\text{D}_6$ )

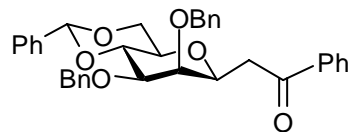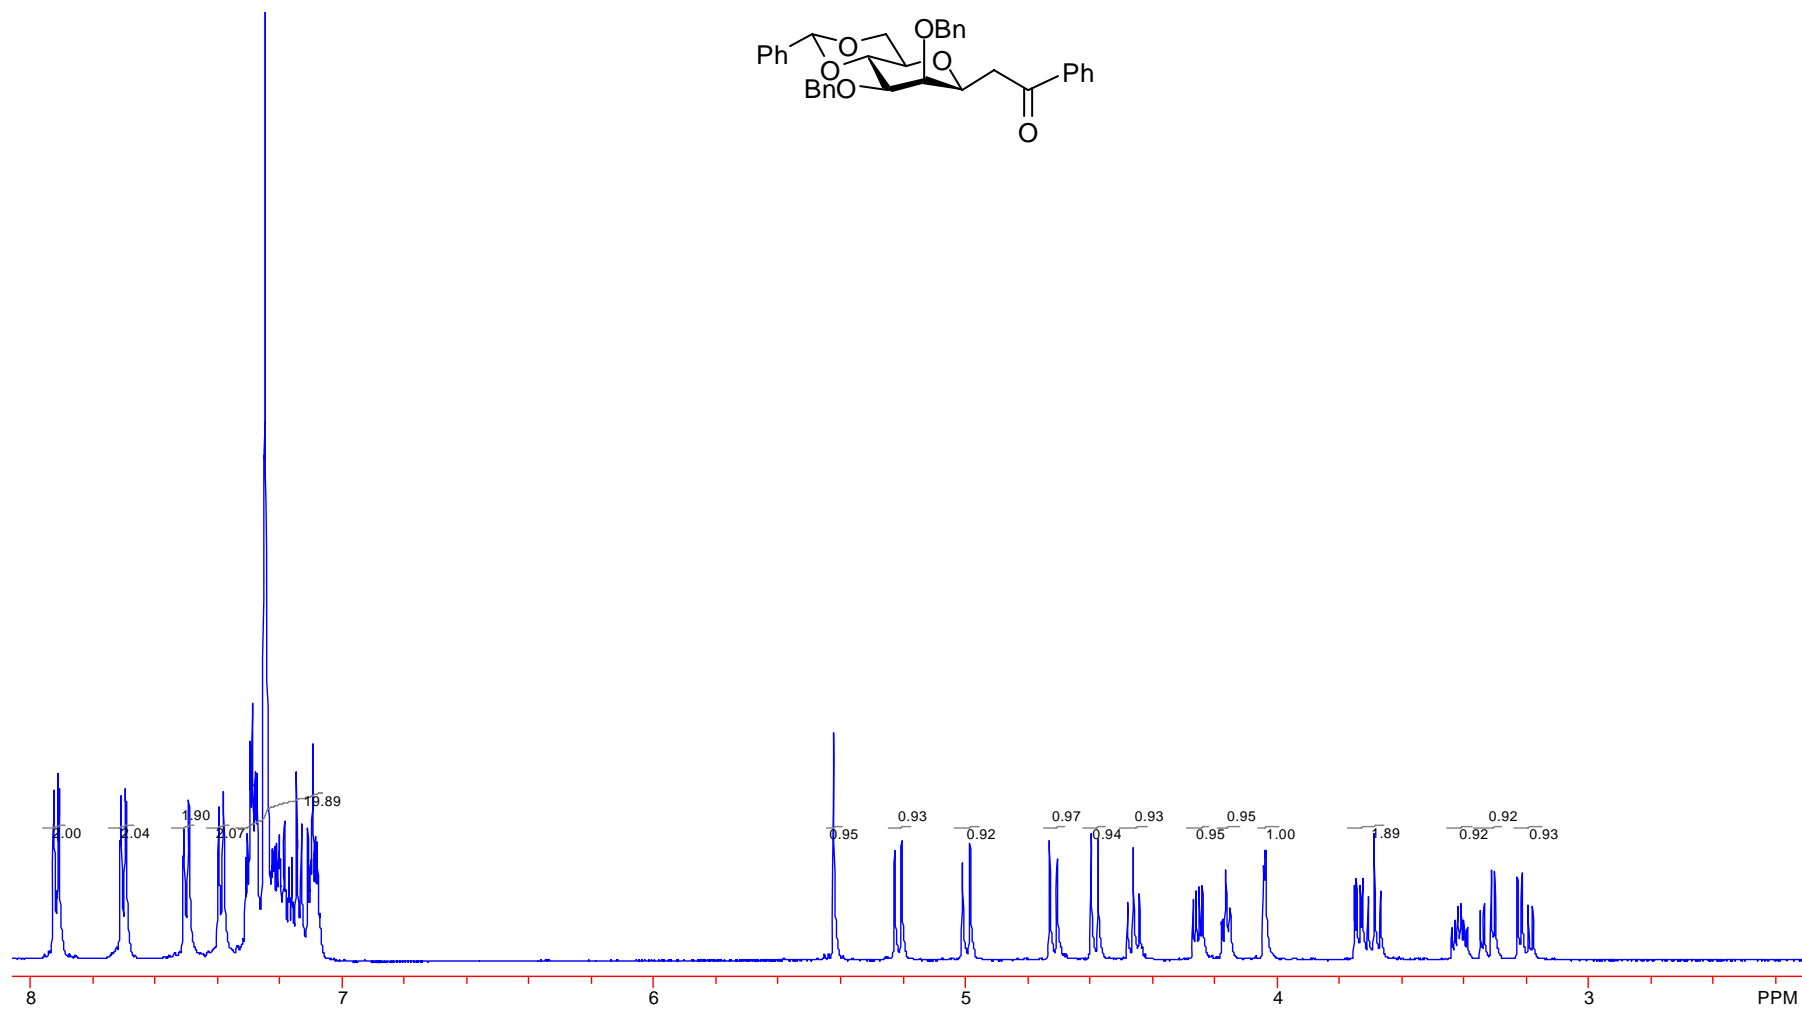

**2,3-Di-O-benzyl-4,6-O-benzylidene-1-deoxy-1-(2-oxo-2-phenylethyl)- $\beta$ -D-mannopyranose (9)**

**$^{13}\text{C}$  NMR (125.9 MHz,  $\text{C}_6\text{D}_6$ )**

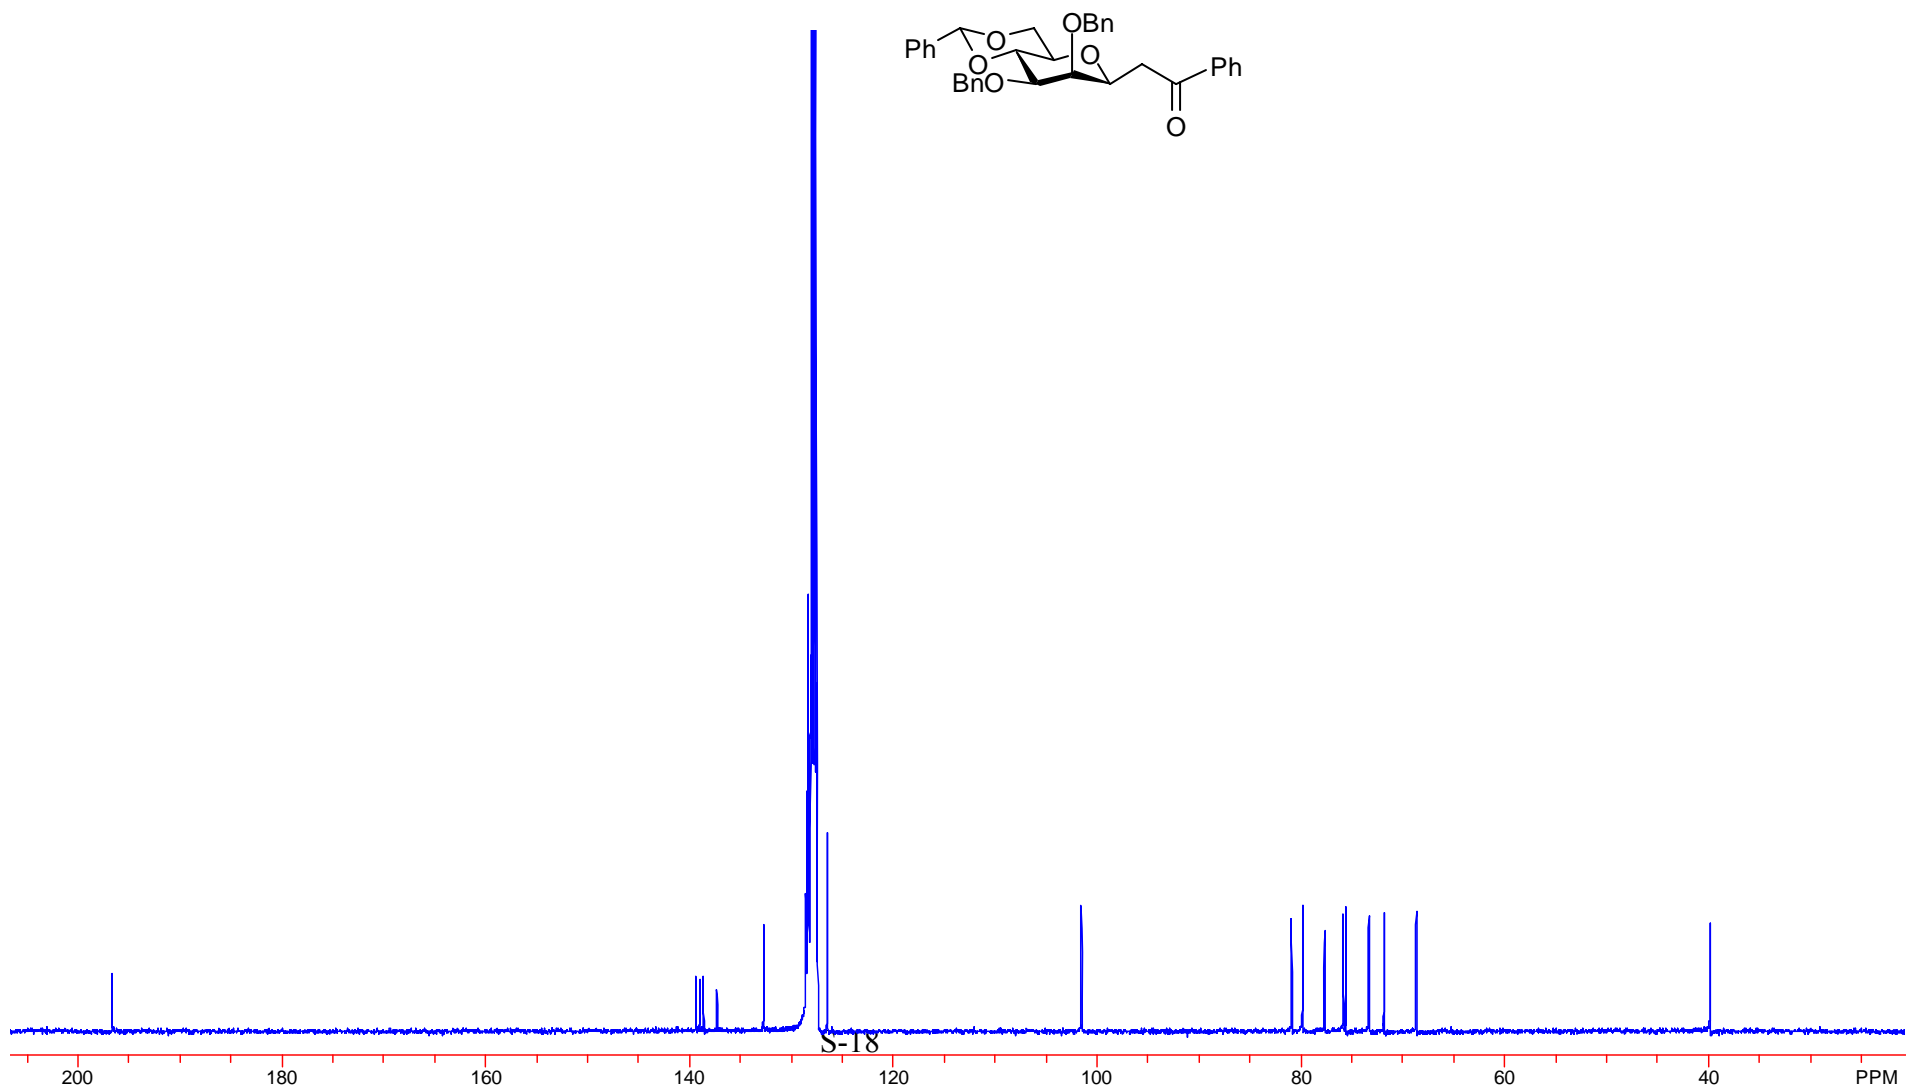

(2,3-Di-*O*-benzyl-4,6-*O*-benzylidene)-1*S*-1-(2-oxo-cyclohexyl)-1-deoxy- $\beta$ -D-mannopyranose (10a)

$^1\text{H}$  NMR (500 MHz,  $\text{CDCl}_3$ )

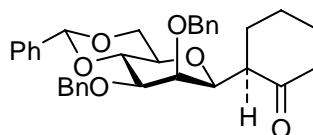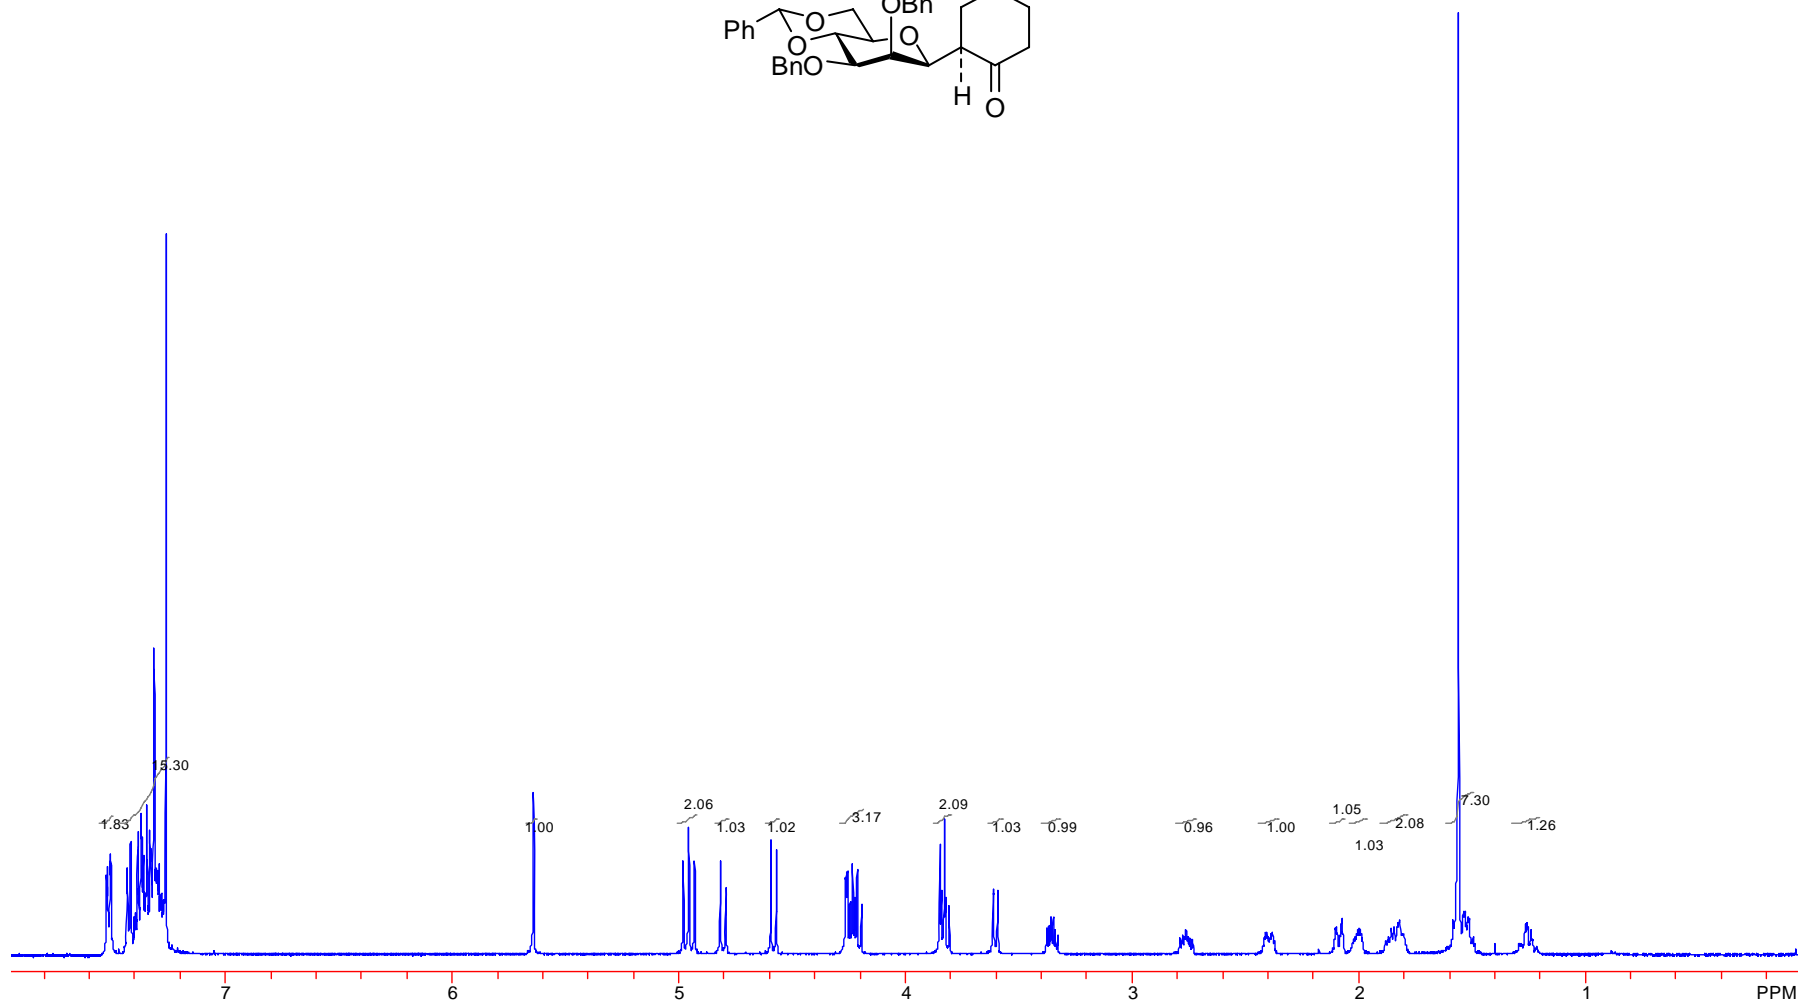

(2,3-Di-*O*-benzyl-4,6-*O*-benzylidene)-1*S*-1-(2-oxo-cyclohexyl)-1-deoxy- $\beta$ -D-mannopyranose (10a)

$^{13}\text{C}$  NMR (125.9 MHz,  $\text{CDCl}_3$ )

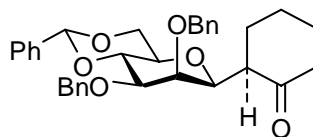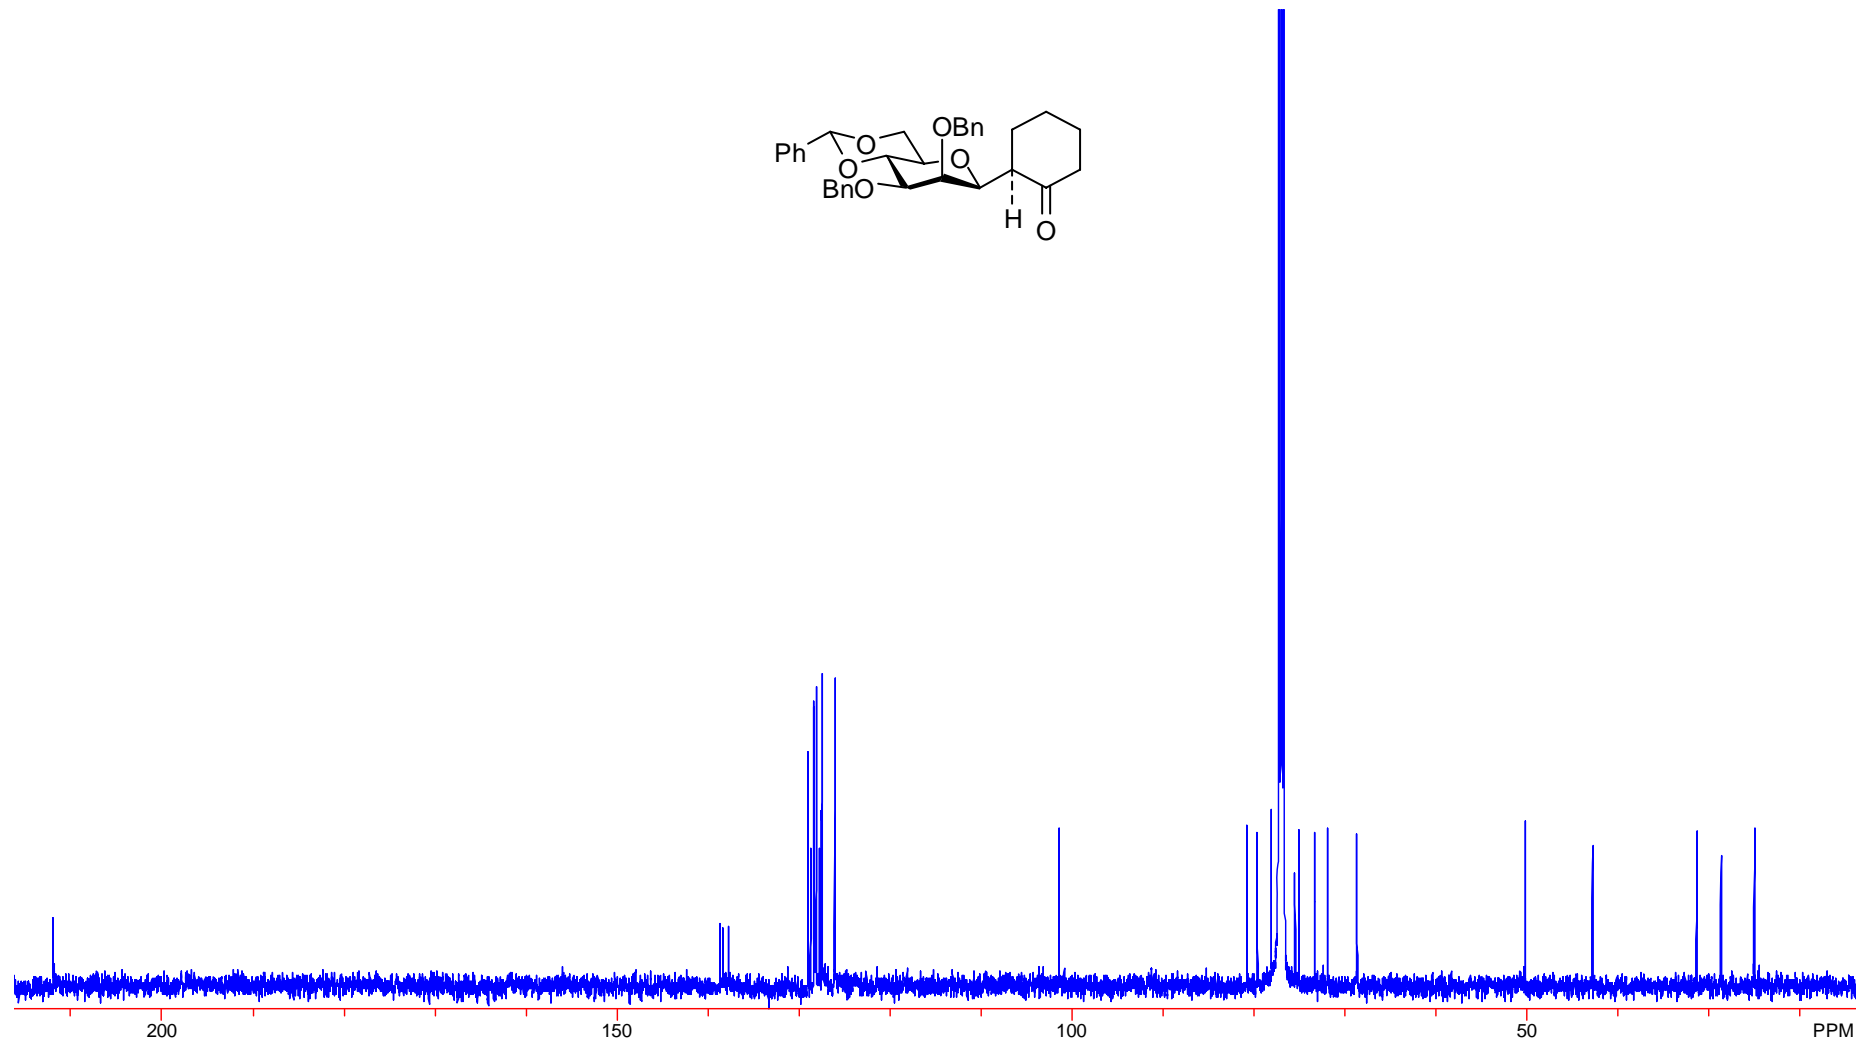

(2,3-Di-O-benzyl-4,6-O-benzylidene-β-D-mannopyranosyl)-1-[2-hydroxy-2-(2-oxocyclohexyl)cyclohexyl] (10b)

<sup>1</sup>H NMR (500 MHz, C<sub>6</sub>D<sub>6</sub>)

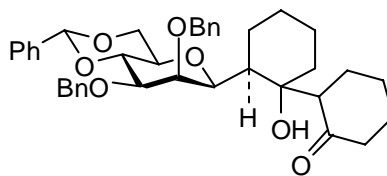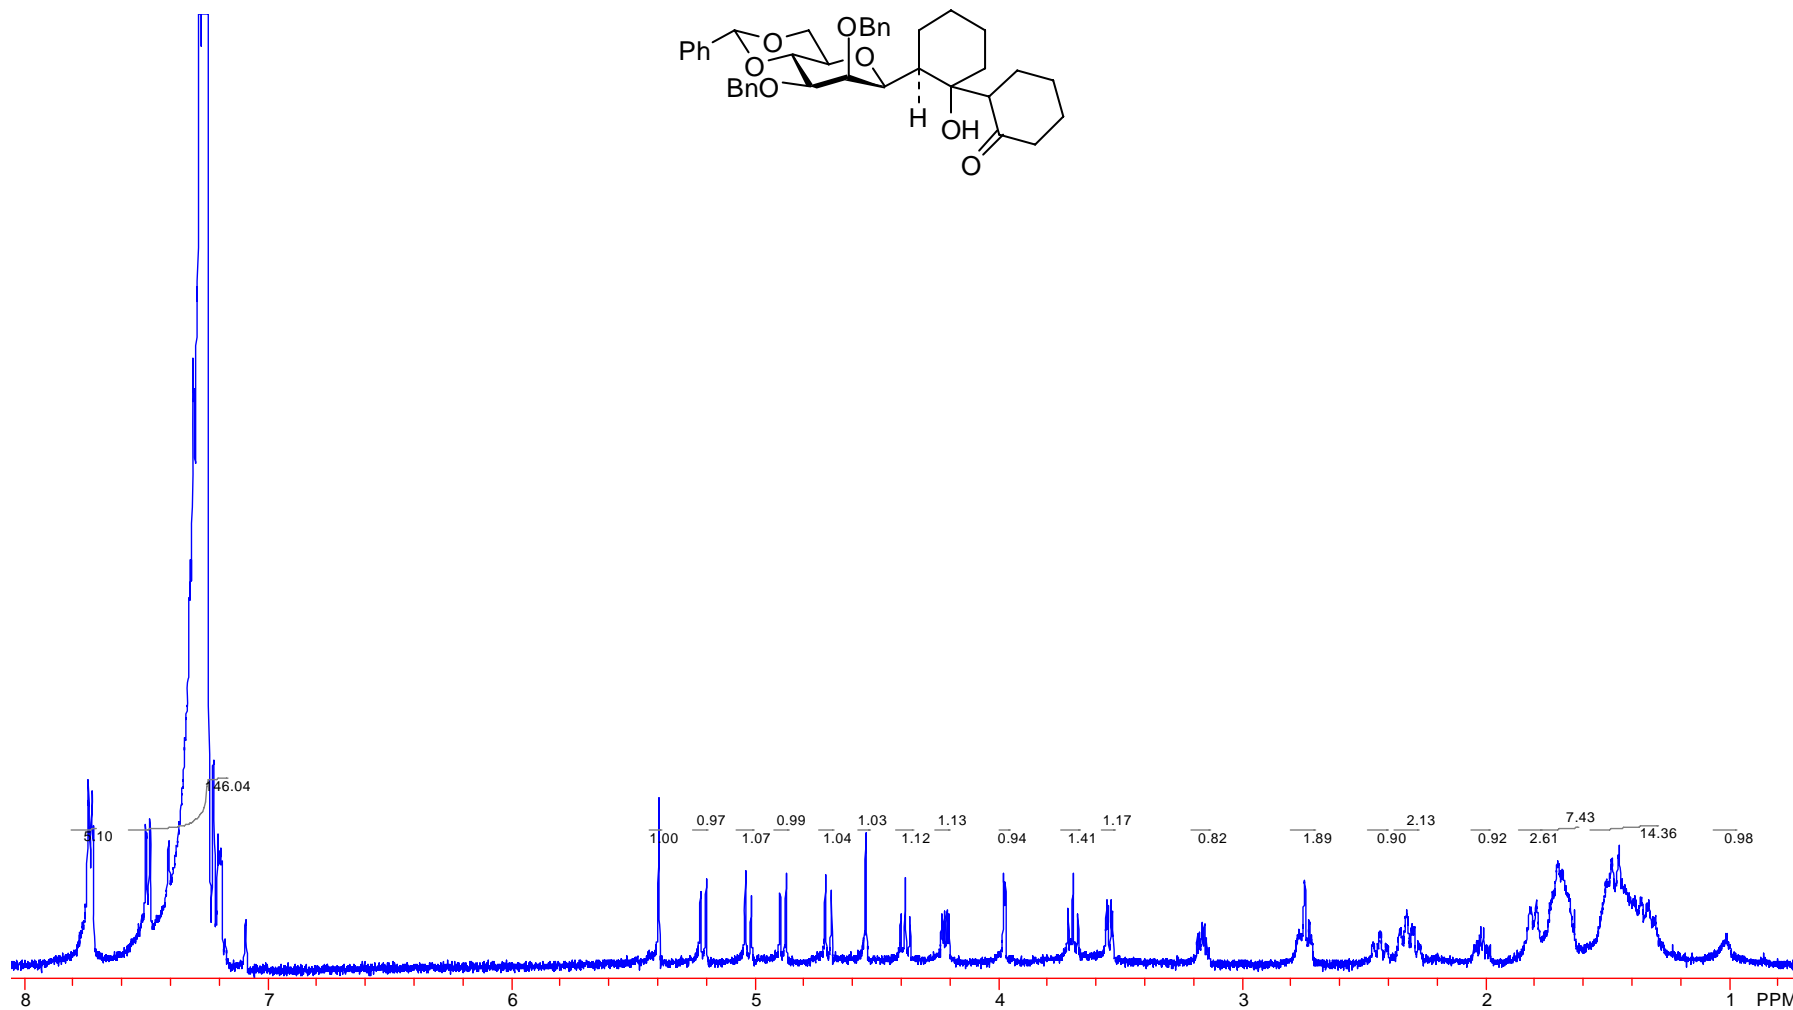

**(2,3-Di-*O*-benzyl-4,6-*O*-benzylidene- $\beta$ -D-mannopyranosyl)-1-[2-hydroxy-2-(2-oxocyclohexyl)cyclohexyl] (10b)**

$^{13}\text{C}$  NMR (125.9 MHz,  $\text{C}_6\text{D}_6$ )

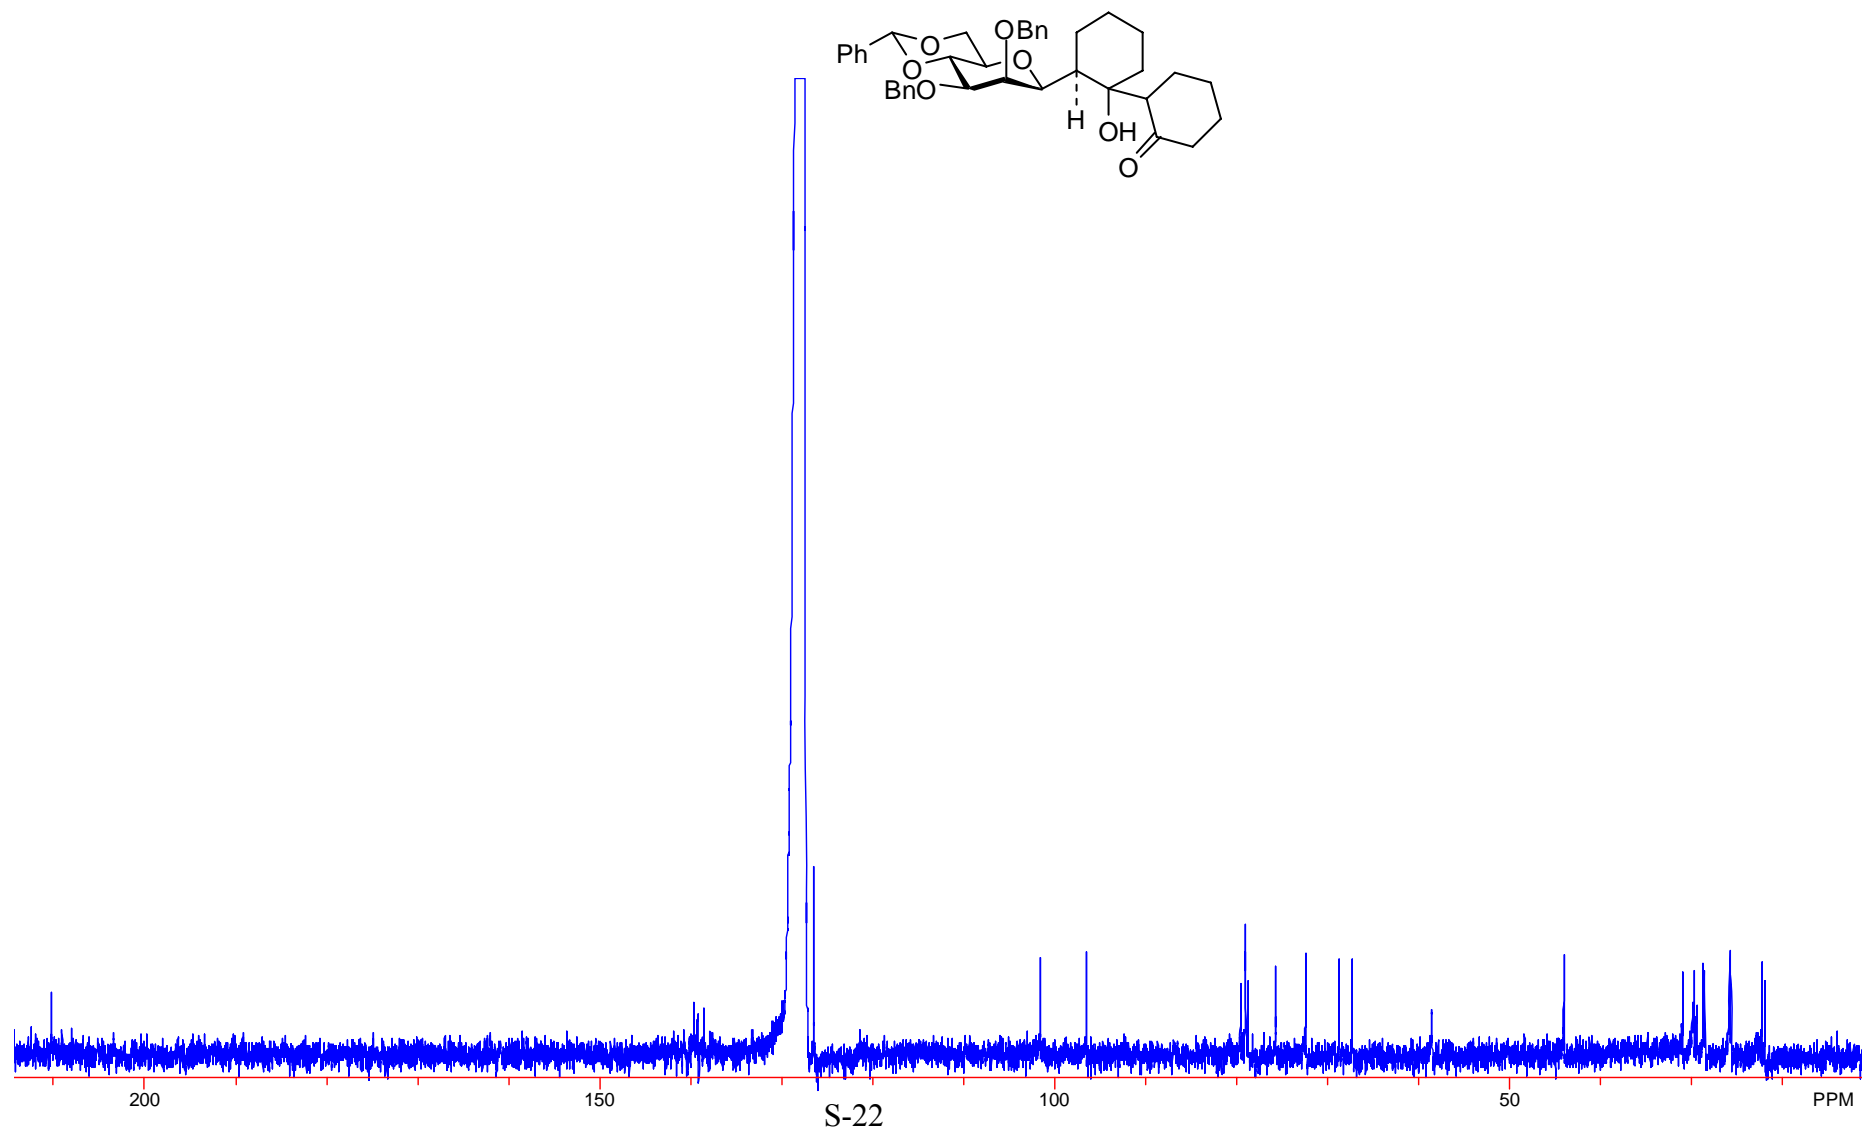

2,3-Di-*O*-benzyl-4,6-*O*-benzylidene-1-deoxy-1-allyl- $\alpha$ -D-glucopyranose (12)

$^1\text{H}$  NMR (500 MHz,  $\text{CDCl}_3$ )

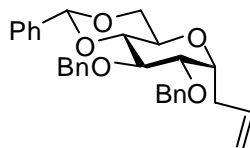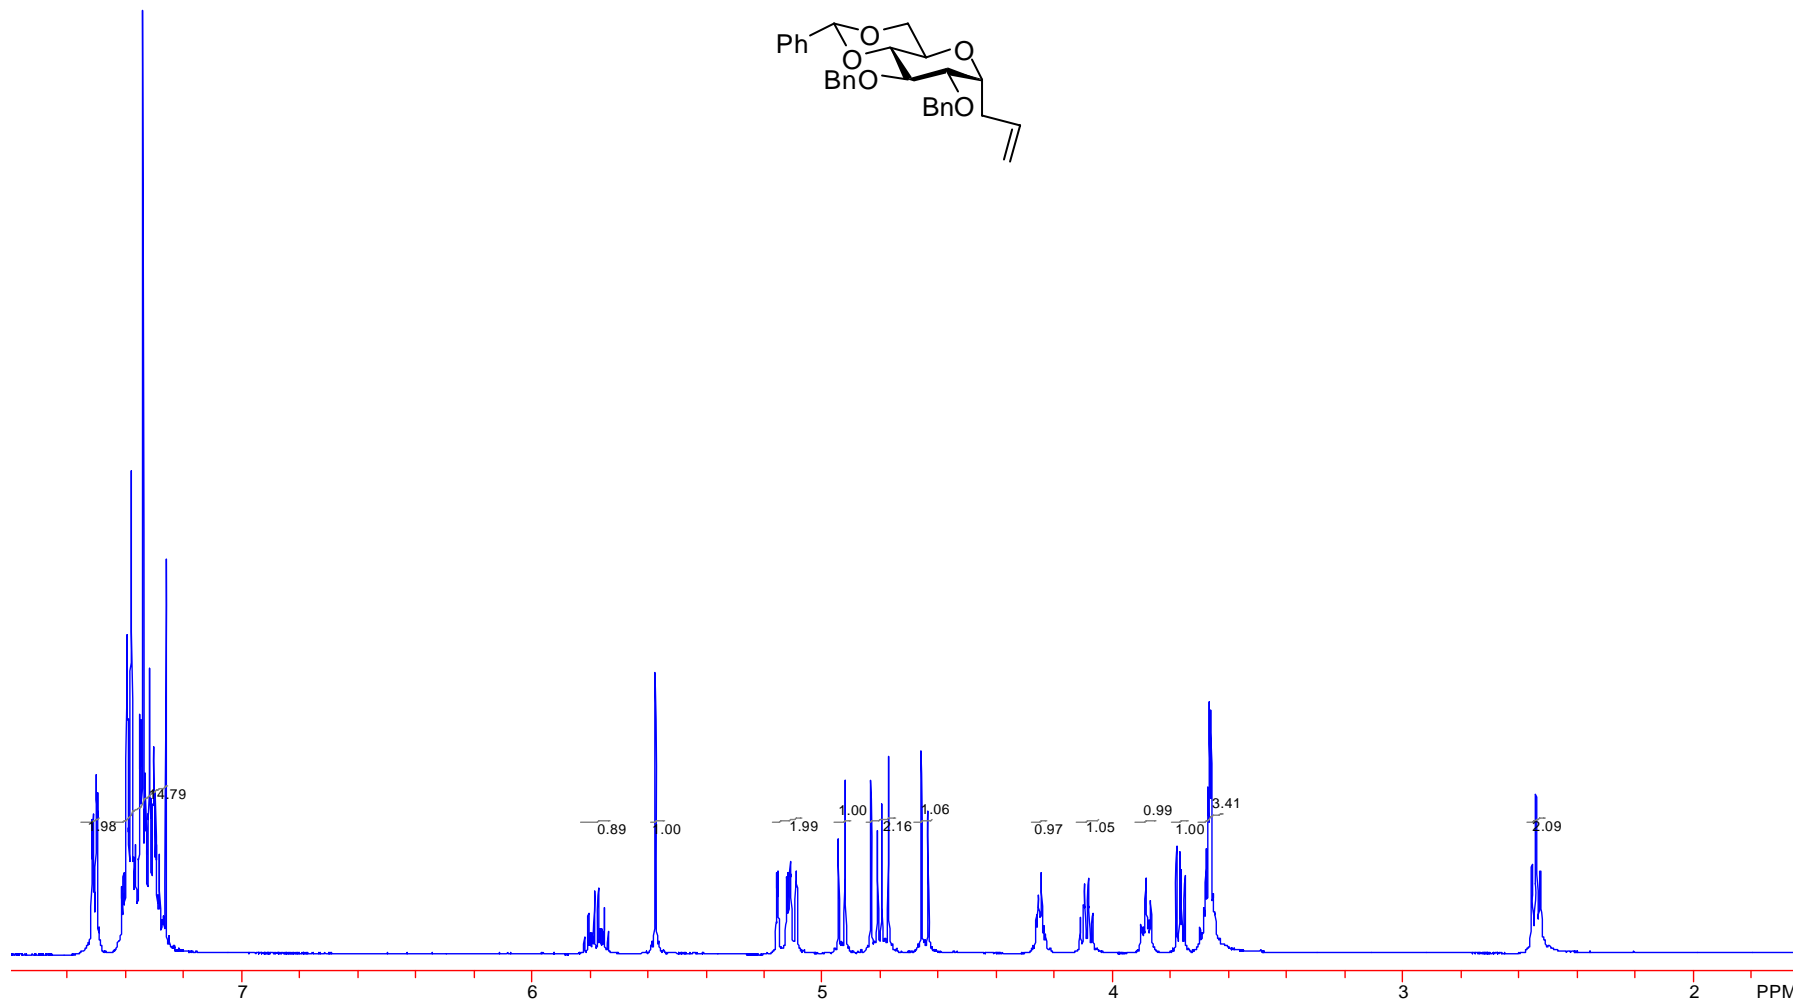

**2,3-Di-*O*-benzyl-4,6-*O*-benzylidene-1-deoxy-1-allyl- $\alpha$ -D-glucopyranose (12)**

$^{13}\text{C}$  NMR (125.9 MHz,  $\text{CDCl}_3$ )

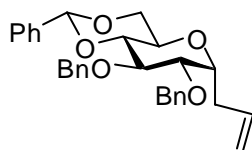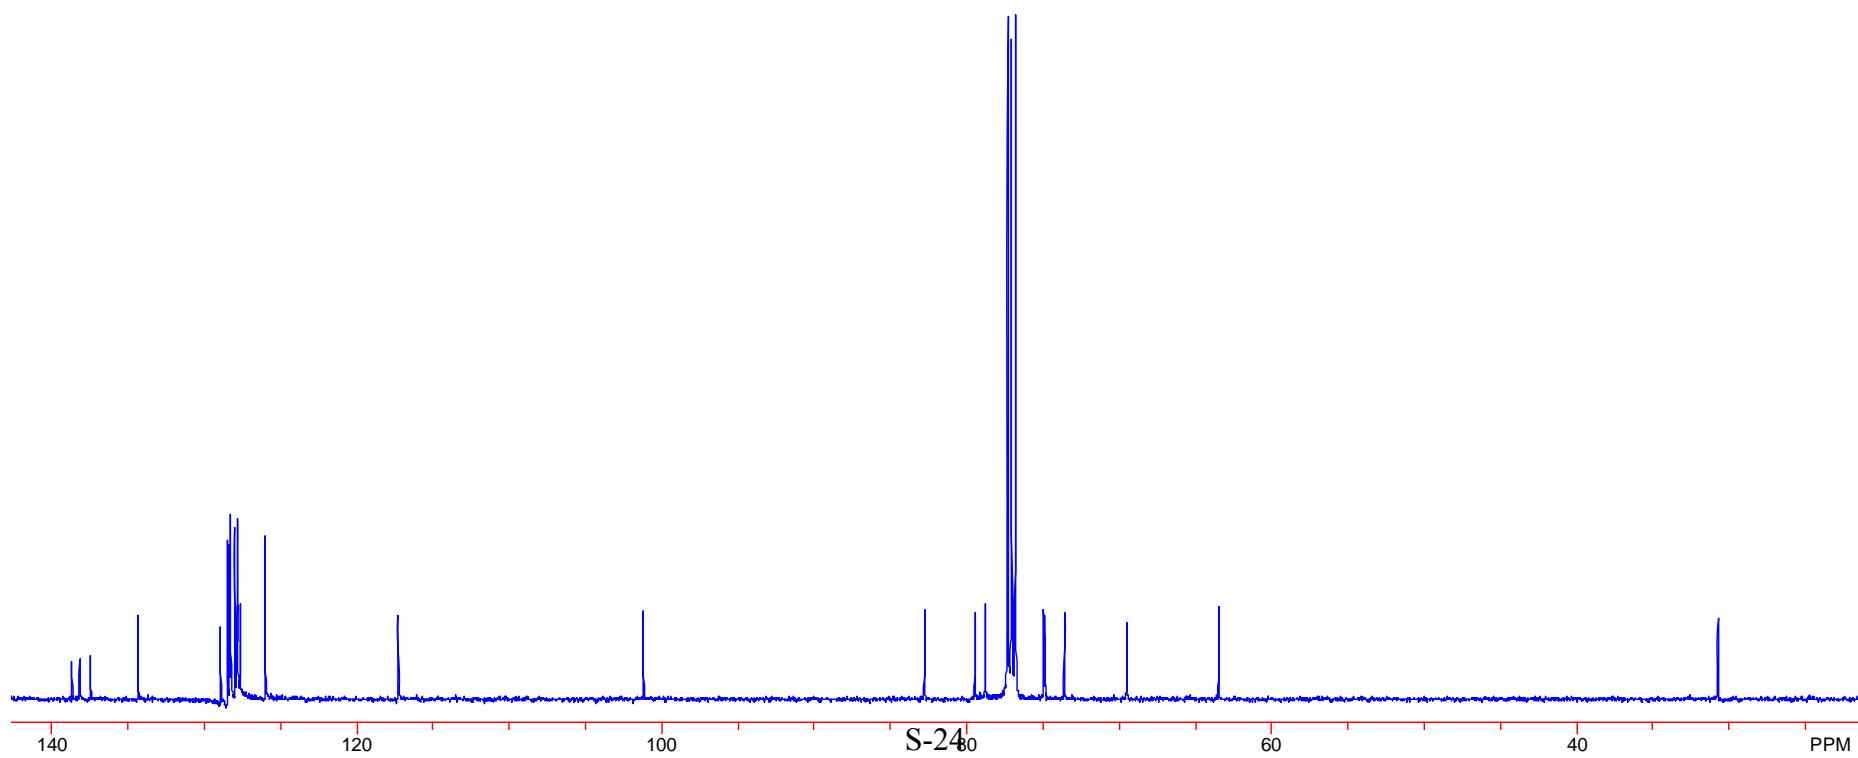



2,3-Di-*O*-benzyl-4,6-*O*-benzylidene-1-deoxy-1-(3,3-dimethyl-2-oxo-butyl)- $\alpha$ -D-glucopyranose (13a)

$^1\text{H}$  NMR (500 MHz,  $\text{C}_6\text{D}_6$ )

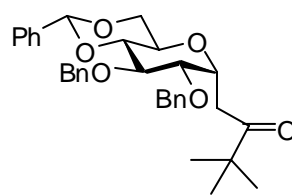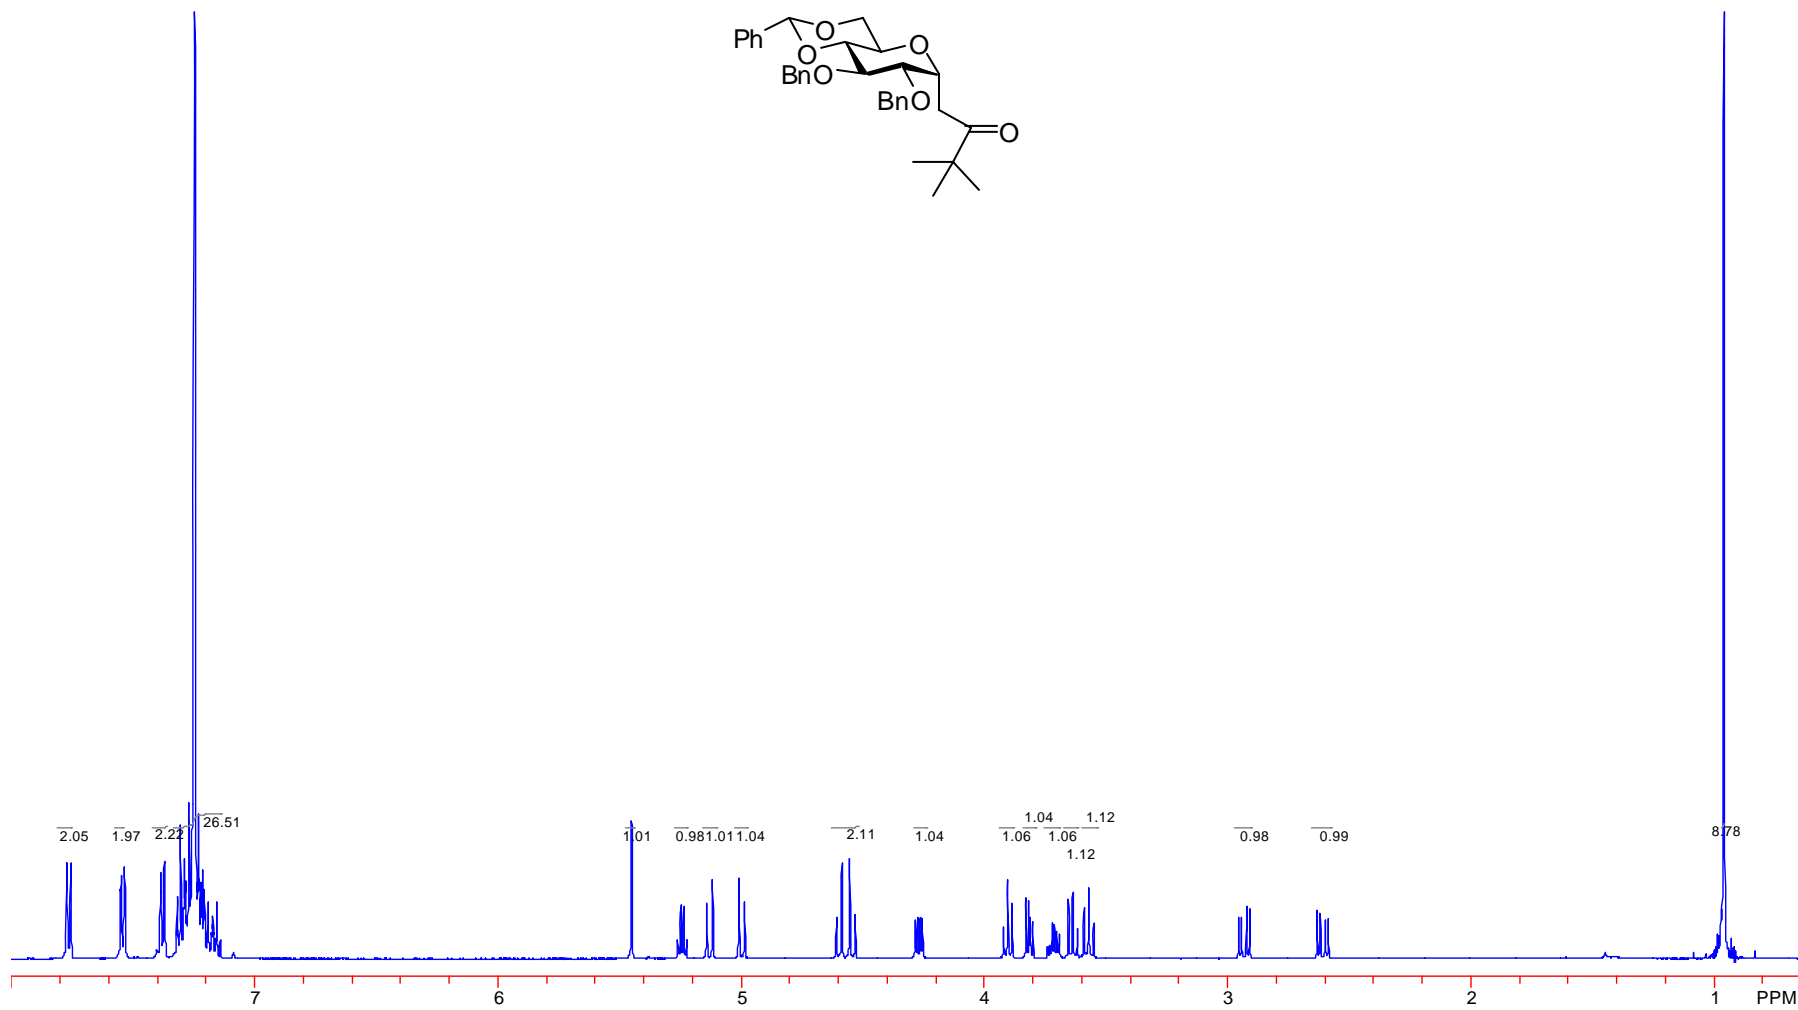

2,3-Di-*O*-benzyl-4,6-*O*-benzylidene-1-deoxy-1-(3,3-dimethyl-2-oxo-butyl)- $\alpha$ -D-glucopyranose (13a)

$^{13}\text{C}$  NMR (125.9 MHz,  $\text{C}_6\text{D}_6$ )

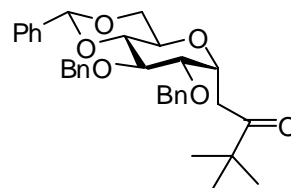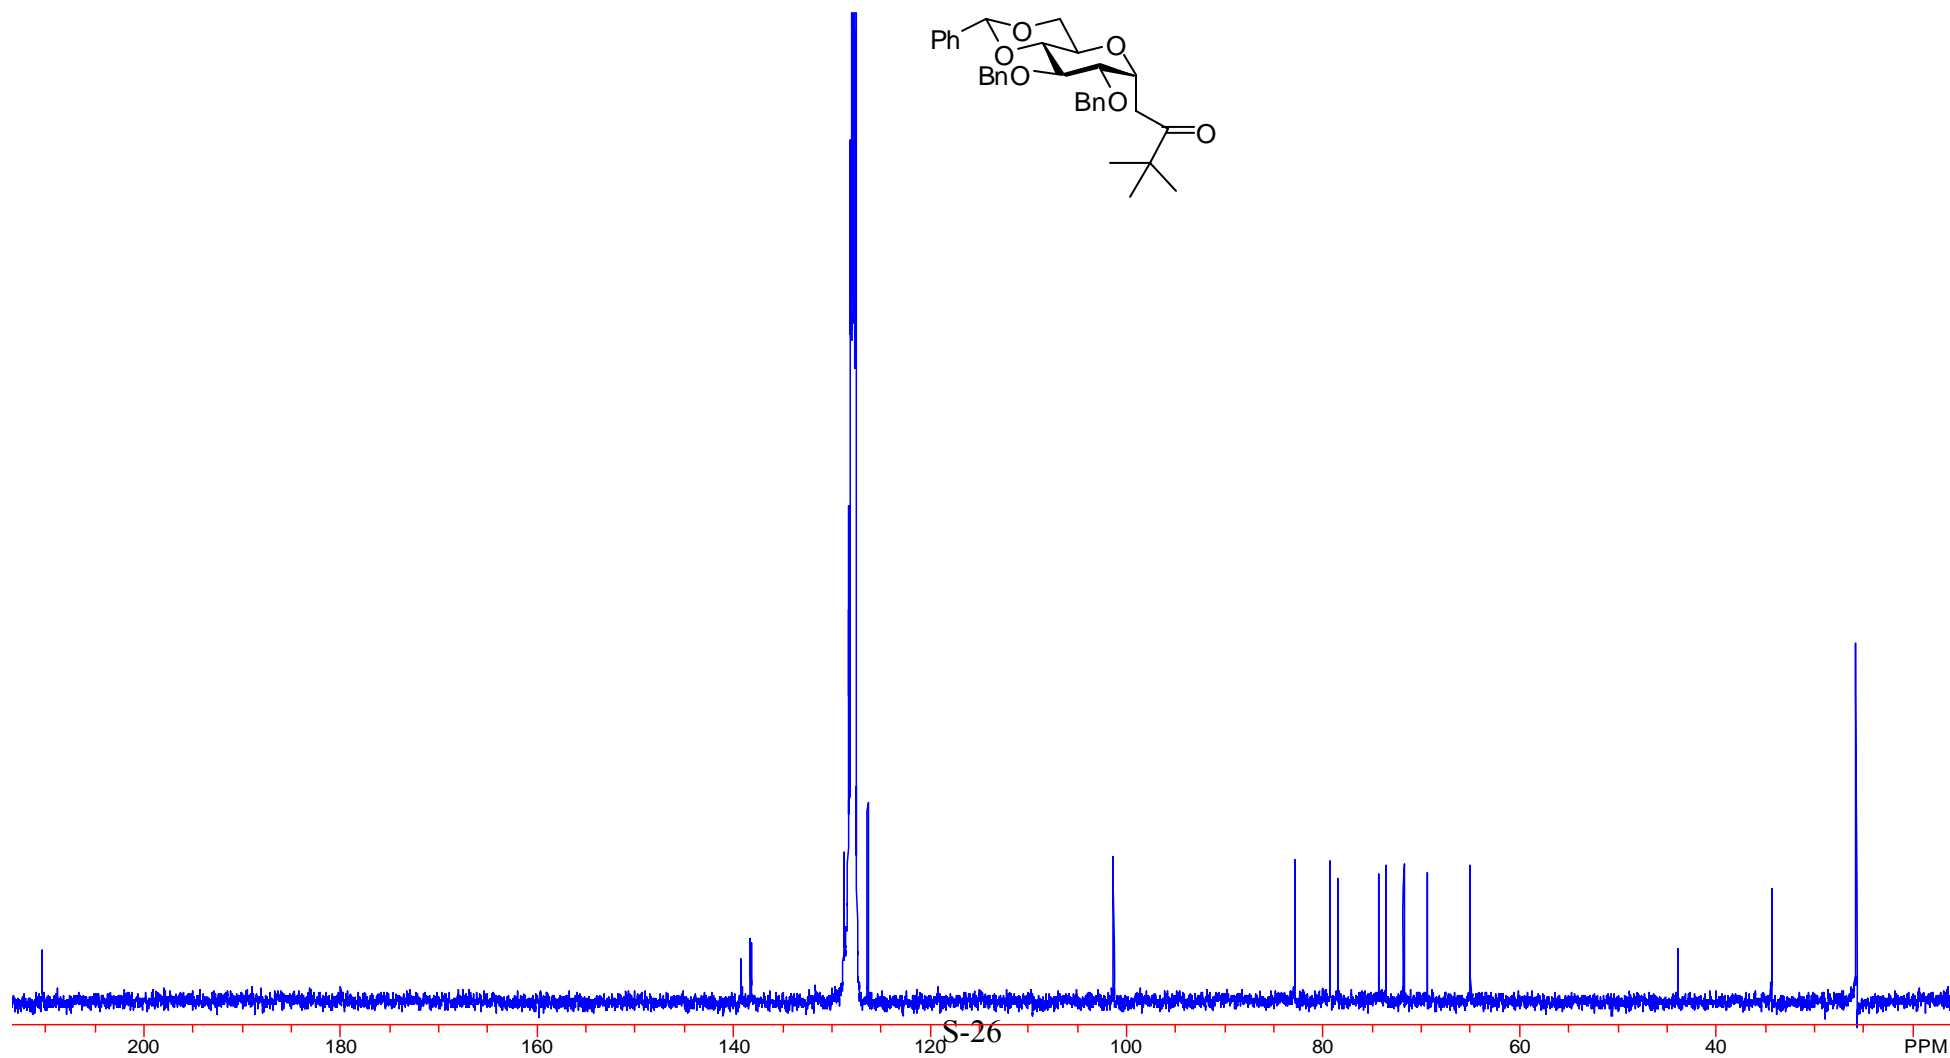

3,3-Dimethyl-2-buten-2-yl 2,3-Di-O-benzyl-4,6-O-benzylidene- $\alpha$ -D-glucopyranoside (13b)

$^1\text{H}$  NMR (500 MHz,  $\text{CDCl}_3$ )

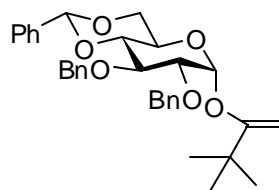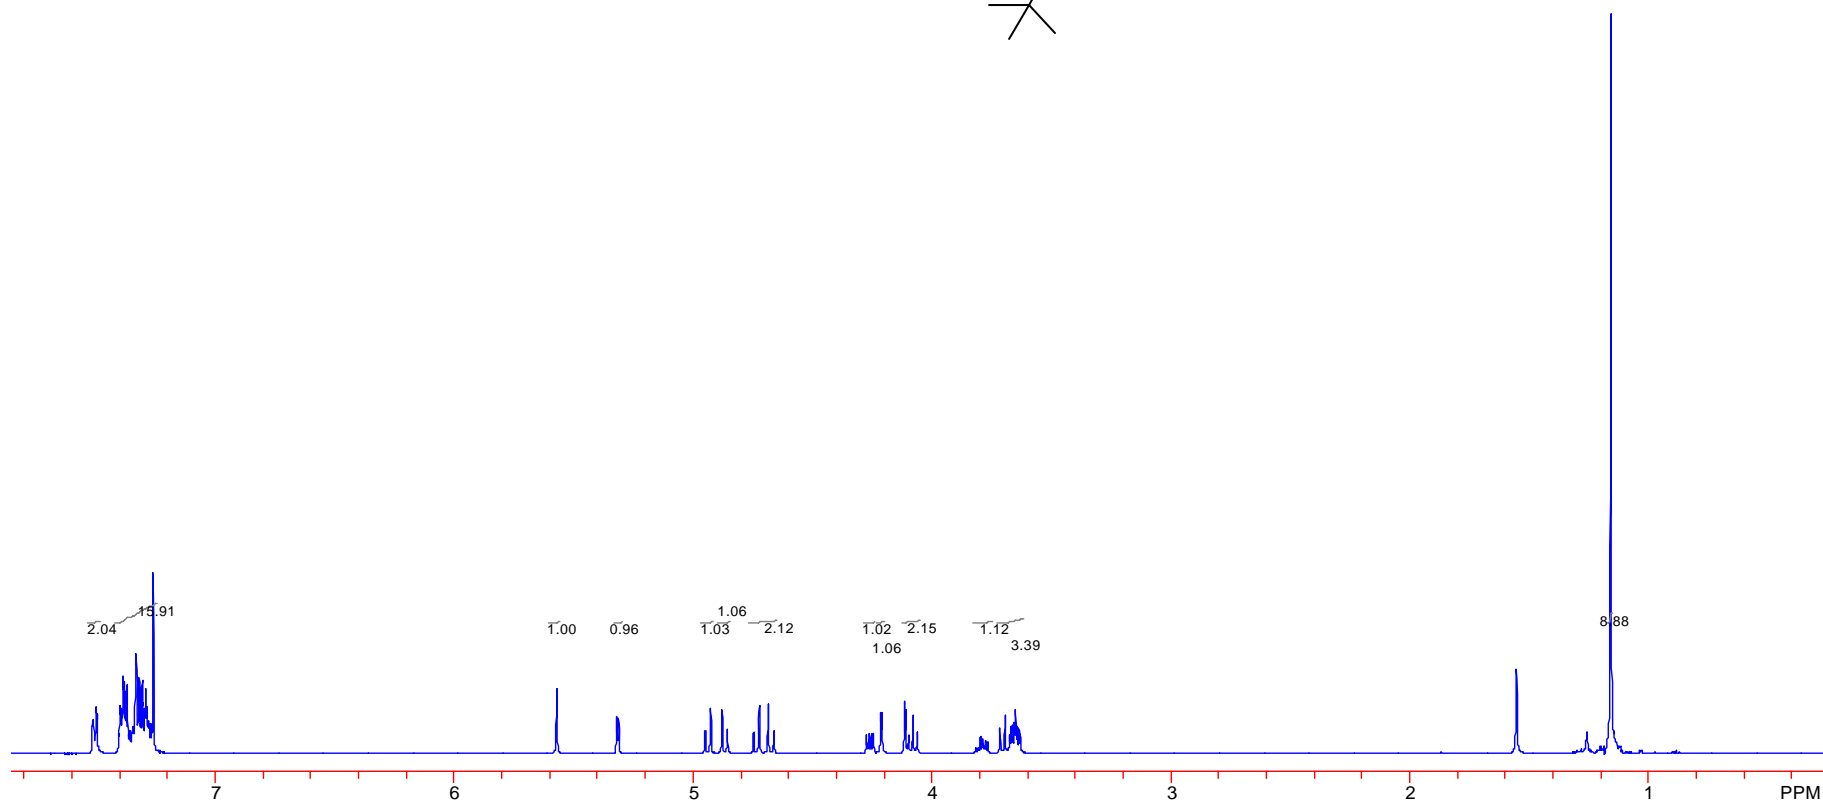

**3,3-Dimethyl-2-buten-2-yl) 2,3-Di-O-benzyl-4,6-O-benzylidene- $\alpha$ -D-glucopyranoside (13b)**

**$^{13}\text{C}$  NMR (125.9 MHz,  $\text{C}_6\text{D}_6$ )**

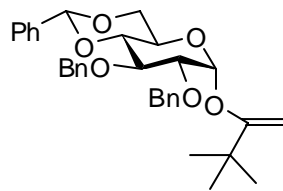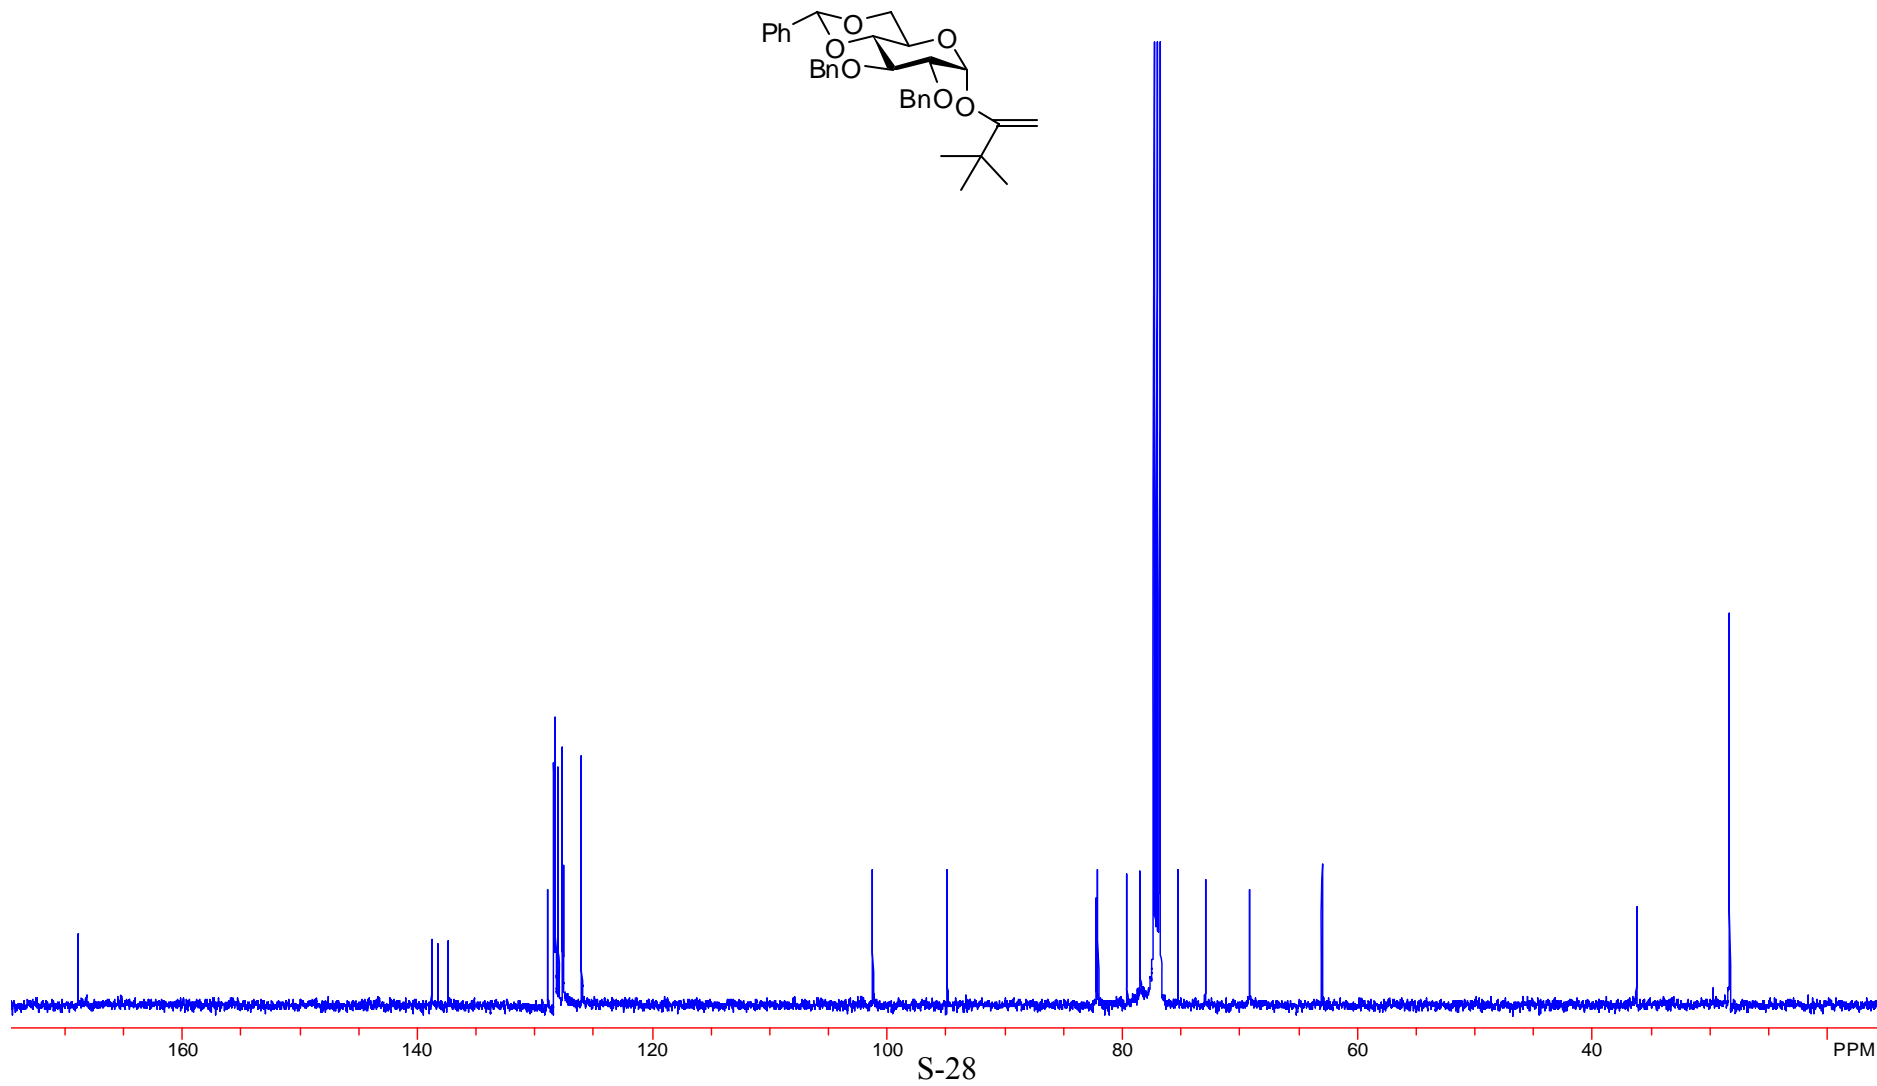

Supplement: NIHMS124740-supplement-Supporting_info.pdf [file NIHMS124740-supplement-Supporting_info.pdf]
